# Supplementary material for: Mitochondria Targeting with Luminescent Rhenium(I) Complexes
Source: PubMed Central journal article supplement (PMC6154647; doi:10.3390/molecules22050809), 2017-05-15
Supplement: molecules-22-00809-s001.pdf [file molecules-22-00809-s001.pdf]

## Mitochondria targeting with luminescent rhenium(I) complexes.

Joanna Skiba<sup>1</sup>, Tytus Bernas<sup>2</sup>, Damian Trzybiński<sup>3</sup>, Krzysztof Woźniak<sup>3</sup>, Giarita Ferraro<sup>4</sup>, Daniela Marasco<sup>5,6,7</sup>, Antonello Merlino<sup>4,7</sup>, Marsel Z. Shafikov<sup>8,10</sup>, Rafał Czerwieniec<sup>9,10,\*</sup> and Konrad Kowalski<sup>1,\*</sup>

<sup>1</sup> Faculty of Chemistry, Department of Organic Chemistry, University of Łódź, Tamka 12, 91-403 Łódź, Poland; asiaskiba@02.pl

<sup>2</sup> Nencki Institute of Experimental Biology, Polish Academy of Sciences, ul. Pasteura 3, 02-093 Warszawa, Poland; t.bernas@nencki.gov.pl

<sup>3</sup> Faculty of Chemistry, Biological and Chemical Research Centre, University of Warsaw, Żwirki i Wigury 101, 02-089 Warszawa, Poland; trzybinski@chem.uw.edu.pl (D.T.); kwozniak@chem.uw.edu.pl (K.W.)

<sup>4</sup> Department of Chemical Sciences, University of Naples Federico II, Complesso Univ. di Monte Sant' Angelo, Via Cintia, I-80126, Napoli, Italy, giarita.ferraro@unina.it (G.F.); antonello.merlino@unina.it (A.M.)

<sup>5</sup> Department of Pharmacy, University of Naples Federico II, Via Mezzocannone 16, 80134, Napoli, Italy; daniela.marasco@unina.it (D. M.)

<sup>6</sup> CIRPEB: Centro Interuniversitario di Ricerca sui Peptidi Bioattivi, Via Mezzocannone 16, I-80134, Napoli, Italy; daniela.marasco@unina.it (D. M.)

<sup>7</sup> CNR Institute of Biostructures and Bioimages, Via Mezzocannone 16, I-80134, Napoli, Italy; antonello.merlino@unina.it (A.M.)

<sup>8</sup> Department of Technology of Organic Synthesis, Institute of Chemical Engineering, Ural Federal University, 19 Mira str., Ekaterinburg, Russia, 620002. shafikoff@gmail.com (M.S.)

<sup>9</sup> Lehrstuhl für Anorganische Chemie I, University of Bayreuth, D-95440 Bayreuth, Germany.

<sup>10</sup> Institut für Physikalische und Theoretische Chemie, Universität Regensburg, Universitätsstraße 31, D-93040 Regensburg, Germany;

\* Correspondence: Rafal.Czerwieniec@uni-bayreuth.de (R.C.); kondor15@wp.pl (K.K.);

## Supplementary Information

## Contents

|                                                                                                                                                                                                           |            |
|-----------------------------------------------------------------------------------------------------------------------------------------------------------------------------------------------------------|------------|
| <b>Figure S1</b> <sup>1</sup> H-NMR spectrum of <b>1</b>                                                                                                                                                  | <b>S3</b>  |
| <b>Figure S2</b> <sup>1</sup> H-NMR spectrum of <b>2</b>                                                                                                                                                  | <b>S4</b>  |
| <b>Figure S3</b> <sup>1</sup> H-NMR spectrum of <b>3</b>                                                                                                                                                  | <b>S5</b>  |
| <b>Figure S4</b> Confocal image of living HeLa cells stained with <b>1</b> and <b>3</b> .                                                                                                                 | <b>S6</b>  |
| <b>Figure S5</b> Confocal image of living HeLa cells stained with <b>2</b> and incubated with FCCP before staining with <b>2</b> .                                                                        | <b>S7</b>  |
| <b>Figure S6.</b> UV-Vis spectra of 0.2 mM compound <b>1</b> or <b>3</b> in 100% DMSO (panels A-C) and 100% ethanol.                                                                                      | <b>S8</b>  |
| <b>Figure S7</b> UV-Vis spectra of 0.2 mM compound <b>1</b> or <b>3</b> in 50% ethanol and 50% PBS pH 7.4 in the absence and in the presence of HEWL and of RNase A.                                      | <b>S10</b> |
| <b>Figure S8</b> UV-Vis spectra of 0.2 mM compound <b>1</b> or <b>3</b> in 50% DMSO and 50% PBS pH 7.4 in the absence and in the presence of HEWL and of RNase A in a 1 : 3 protein to metal molar ratio. | <b>S11</b> |
| <b>Figure S9</b> Fluorescence spectra of HEWL in the presence of increasing concentration of complex <b>1</b> and complex <b>3</b> upon excitation at 375nm.                                              | <b>S12</b> |
| <b>Figure S10</b> Sensorgrams for the interaction between compound <b>3</b> and HEWL at 50, 100 and 200 μM.                                                                                               | <b>S13</b> |
| <b>Table S1</b> Crystallographic data and structural refinement details of <b>1–3</b> .                                                                                                                   | <b>S14</b> |
| <b>Table S2</b> Bond lengths for <b>1</b> .                                                                                                                                                               | <b>S15</b> |
| <b>Table S3</b> Valence angles for <b>1</b> .                                                                                                                                                             | <b>S16</b> |
| <b>Table S4</b> Torsion angles for <b>1</b> .                                                                                                                                                             | <b>S17</b> |
| <b>Table S5</b> Bond lengths for <b>2</b> .                                                                                                                                                               | <b>S19</b> |
| <b>Table S6</b> Valence angles for <b>2</b> .                                                                                                                                                             | <b>S20</b> |
| <b>Table S7</b> Torsion angles for <b>2</b> .                                                                                                                                                             | <b>S21</b> |
| <b>Table S8</b> Bond lengths for <b>3</b> .                                                                                                                                                               | <b>S22</b> |
| <b>Table S9</b> Valence angles for <b>3</b> .                                                                                                                                                             | <b>S24</b> |
| <b>Table S10</b> Torsion angles for <b>3</b> .                                                                                                                                                            | <b>S27</b> |

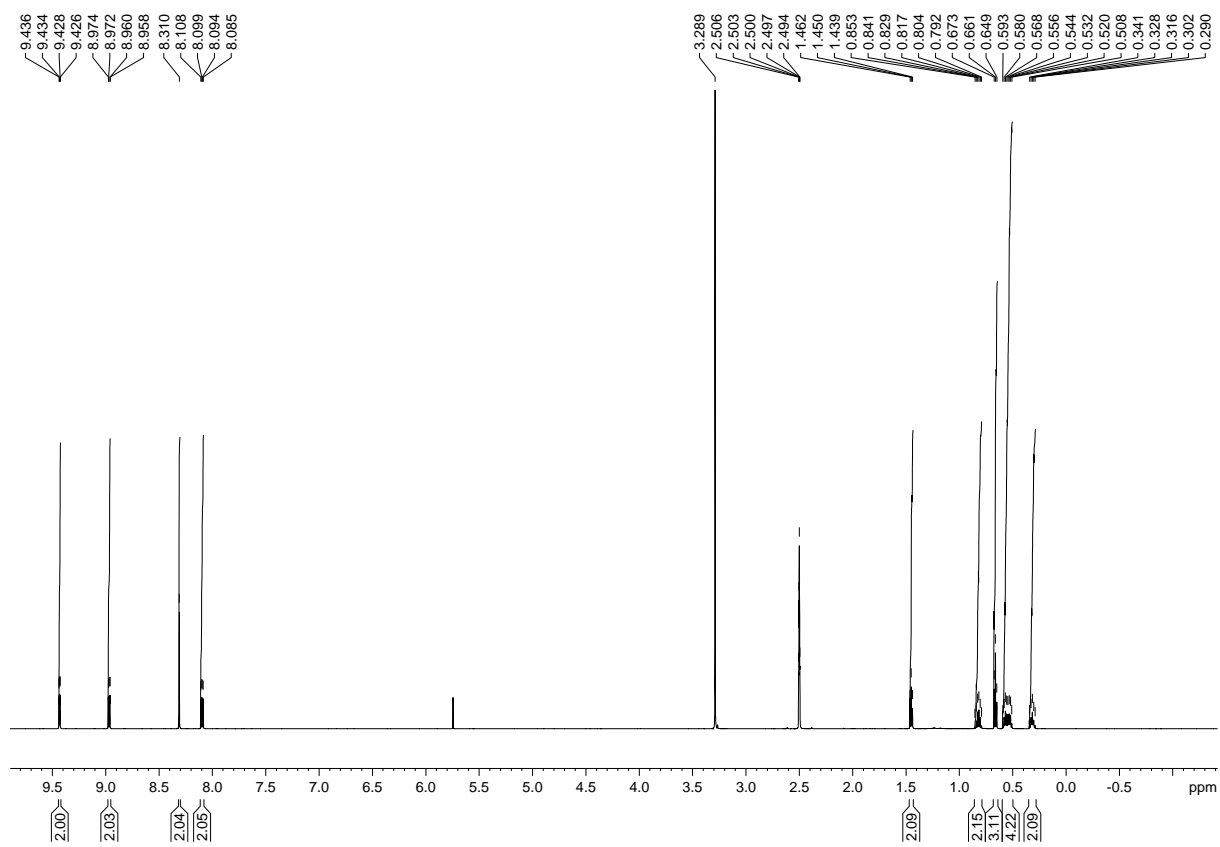

Figure S1  $^1\text{H}$  NMR spectrum of **1**

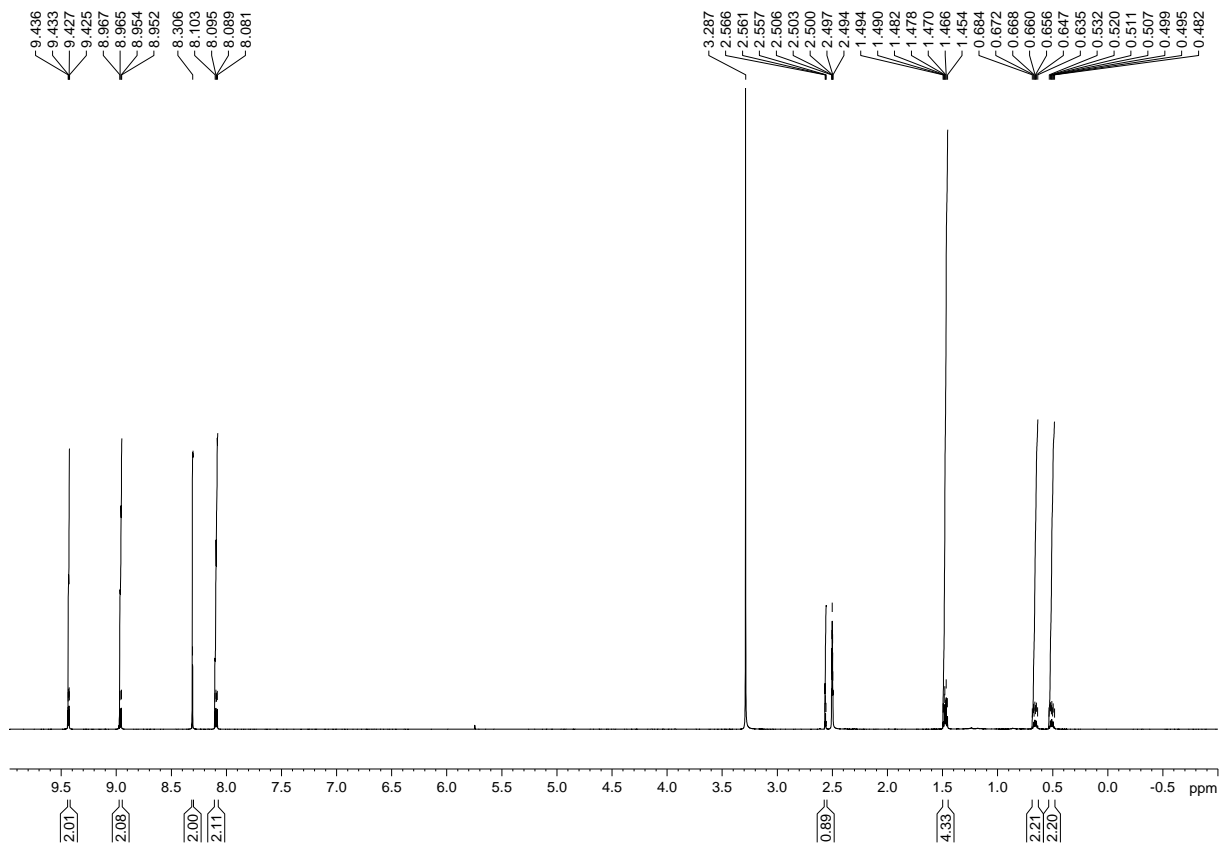

**Figure S2**  $^1\text{H}$  NMR spectrum of **2**

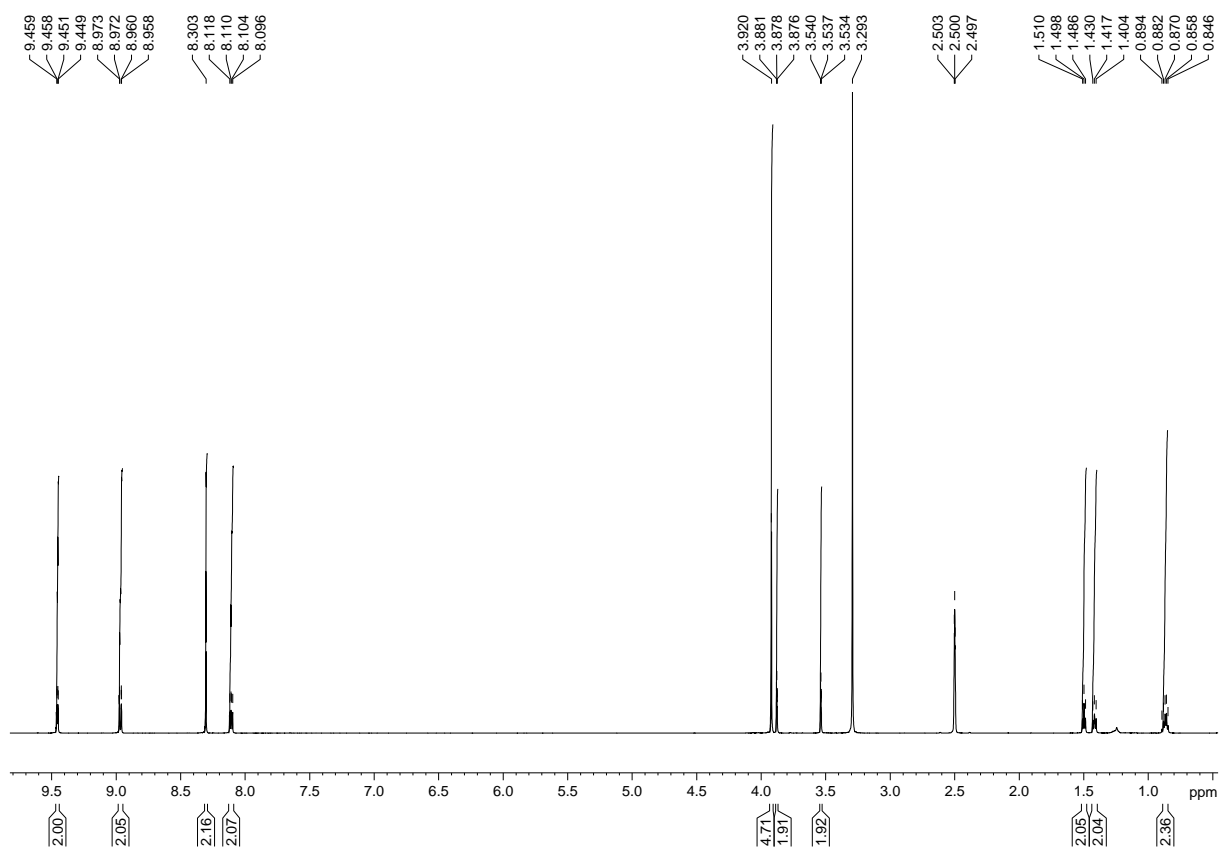

**Figure S3**  $^1\text{H}$  NMR spectrum of **3**

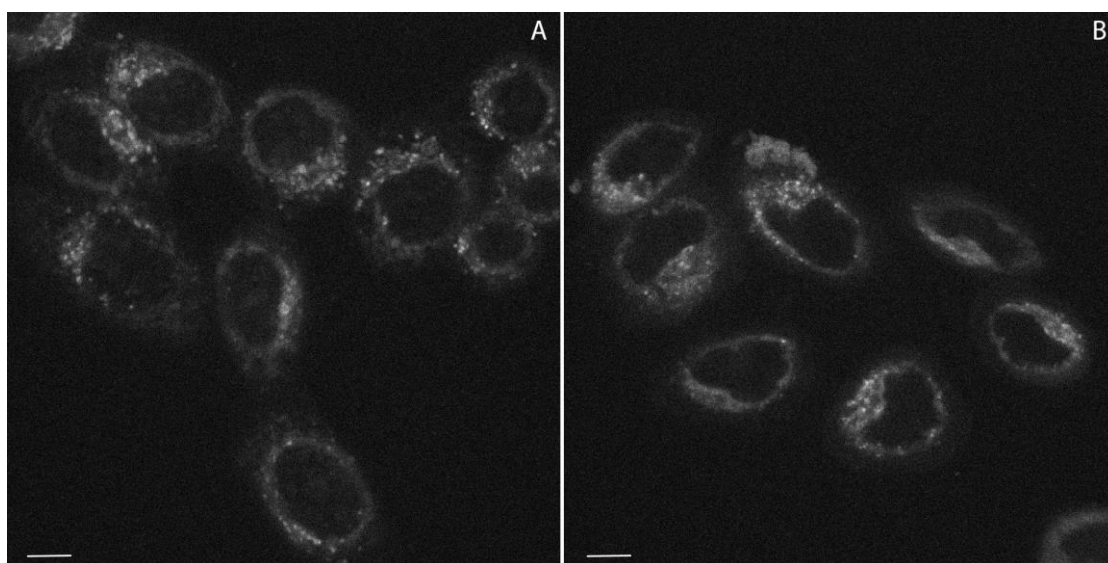

**Fig. S4.** A: confocal luminescence image of living HeLa cells stained with **1**. B: confocal luminescence image of living HeLa cells stained with **3**. Emission wavelengths are represented using a false colour. Scale bar 10  $\mu\text{m}$ .

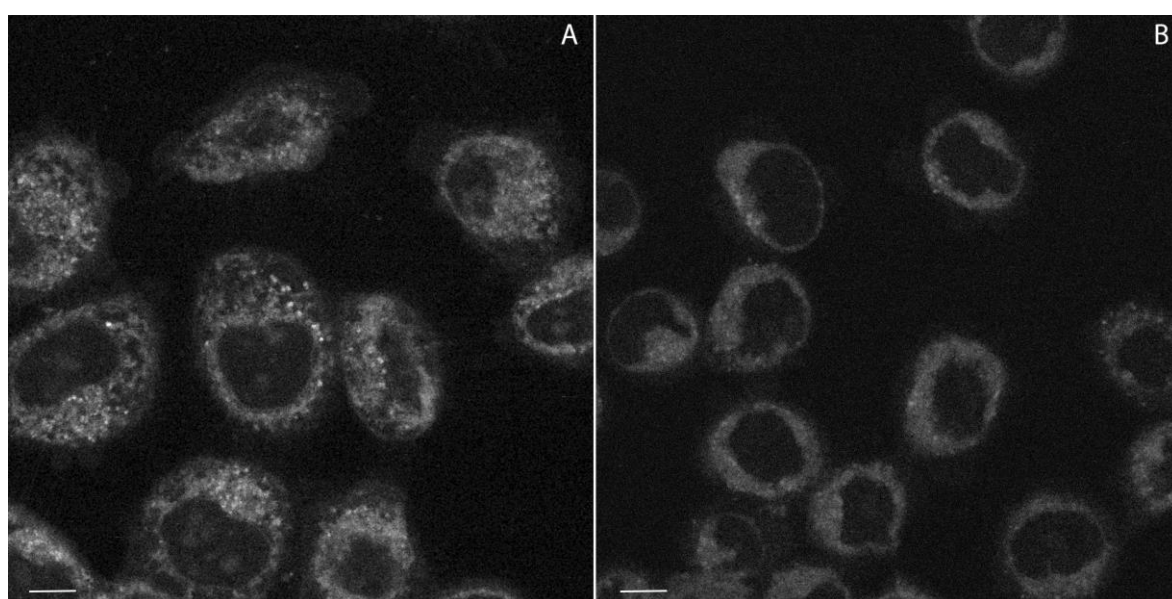

**Fig. S5.** A: confocal luminescence image of living HeLa cells stained with **1**. B: confocal luminescence image of living HeLa cells preincubated with FCCP and then stained with **1**. Emission wavelengths are represented using a false colour. Scale bar 10  $\mu\text{m}$ .

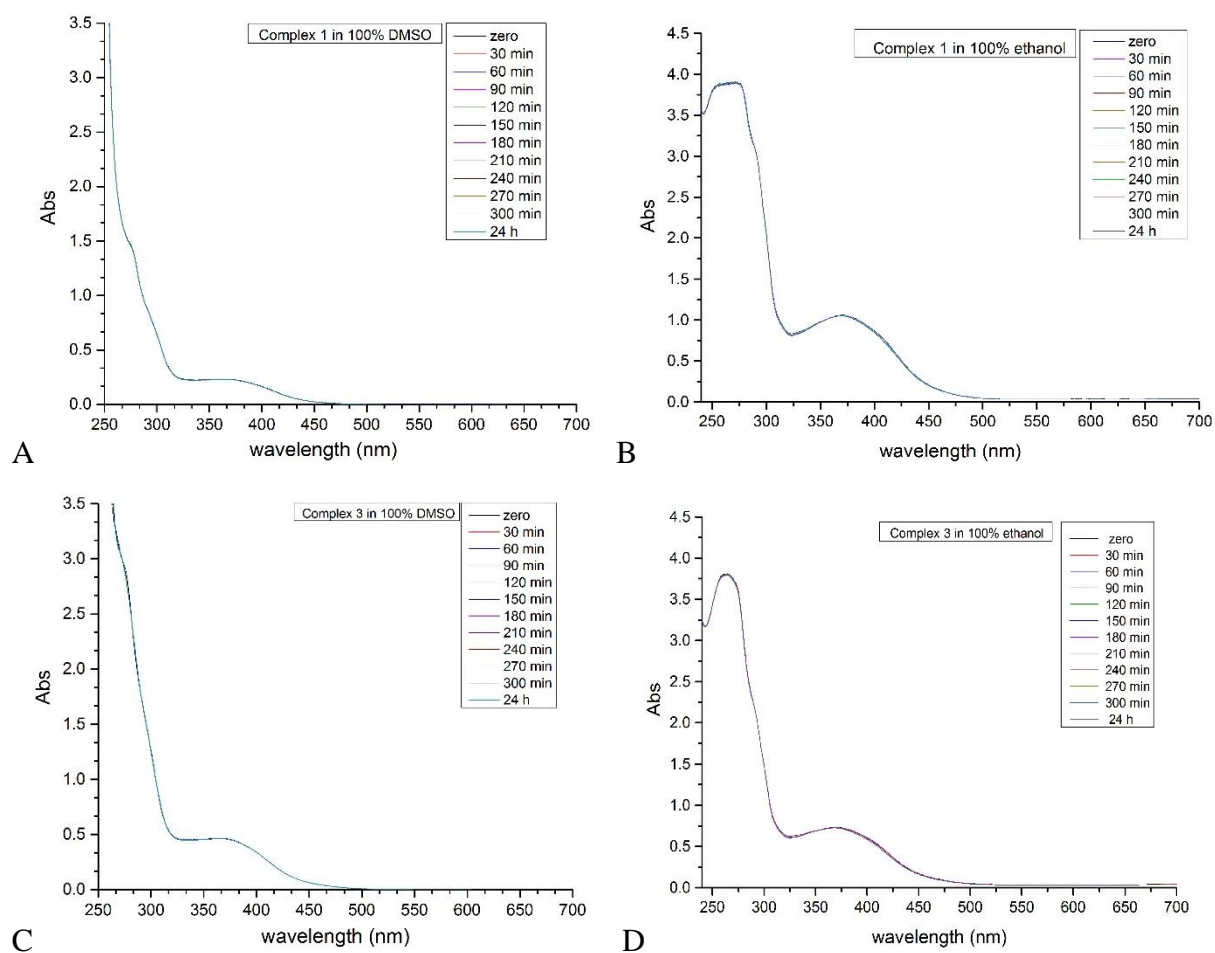

**Fig. S6.** UV-Vis spectra of 0.2 mM compound 1 or 3 in 100% DMSO (panels A-C) and 100% ethanol (panels B-D). Spectra were recorded for 24 h.



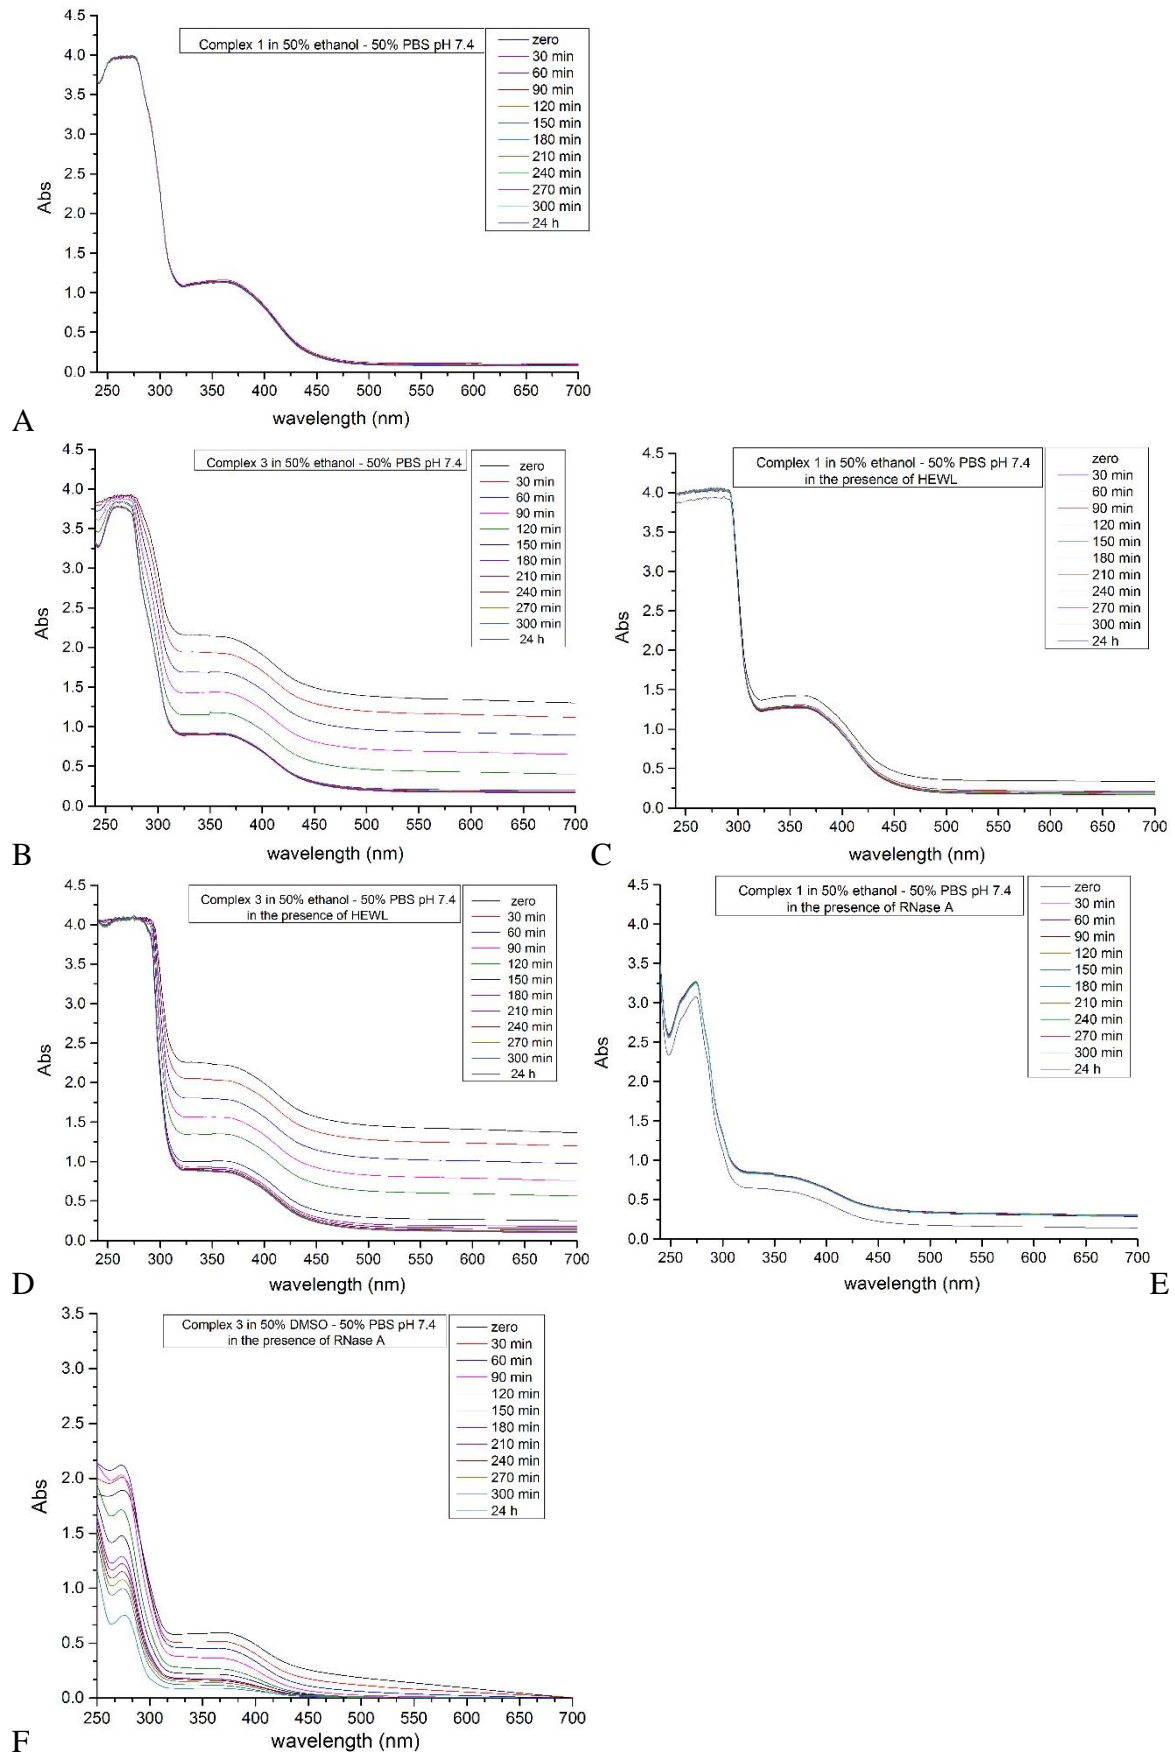

**Fig. S7** UV-Vis spectra of 0.2 mM compound **1** or **3** in 50% ethanol and 50% PBS pH 7.4 in the absence (panels A-B) and in the presence of HEWL (panels C-D) and of RNase A (panels E-F) in a 1 : 3 protein to metal molar ratio. Spectra were recorded for 24 h. The change of the baseline for compound **3** in ethanol/PBS is probably due to the presence of molecules not completely dissolved in this mixture that scatters a fraction of light.

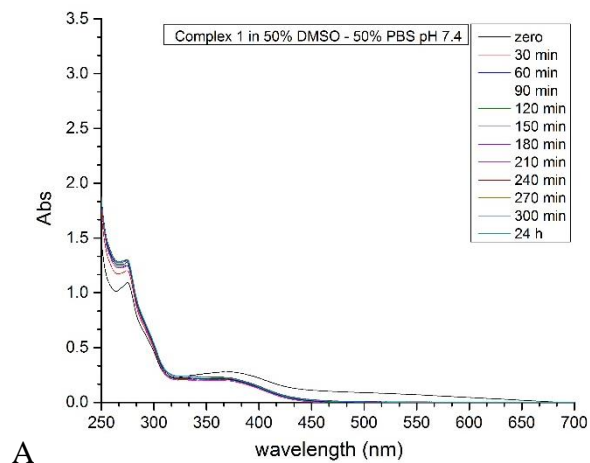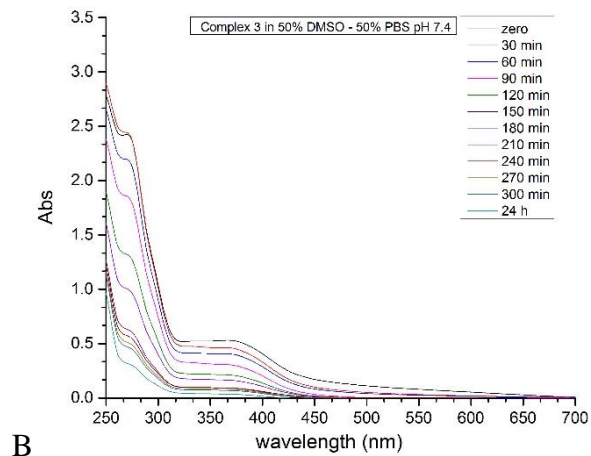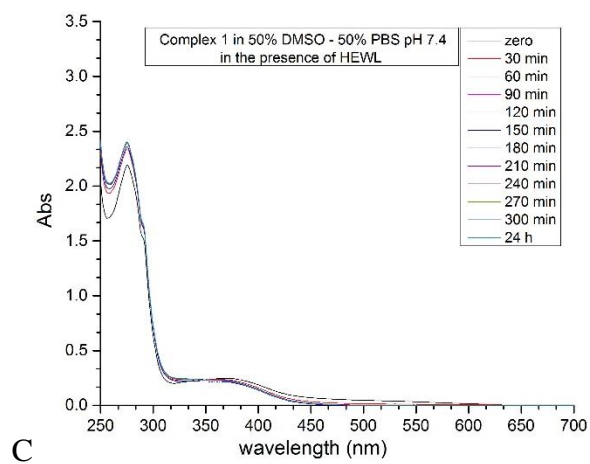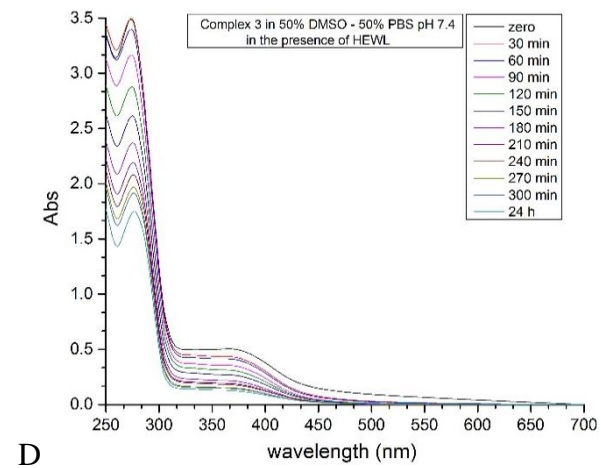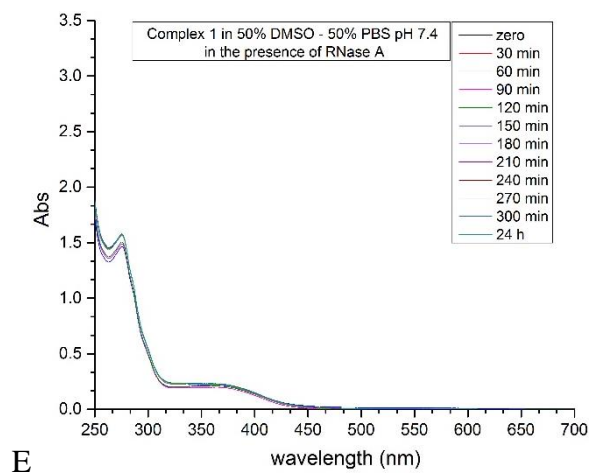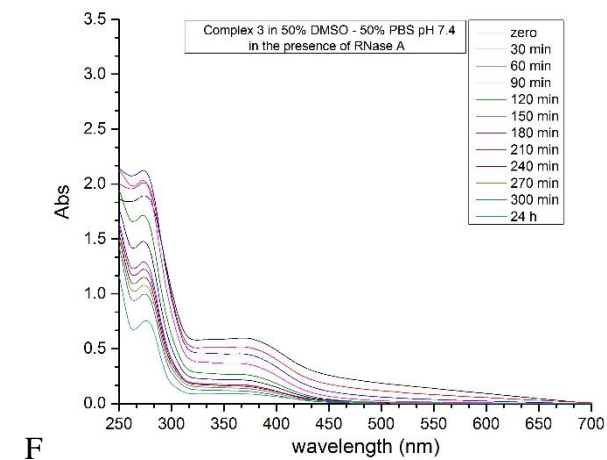

**Fig. S8.** UV-Vis spectra of 0.2 mM compound **1** or **3** in 50% DMSO and 50% PBS pH 7.4 in the absence (panels A-B) and in the presence of HEWL (panels C-D) and of RNase A (panels E-F) in a 1 : 3 protein to metal molar ratio. Spectra were recorded for 24 h.

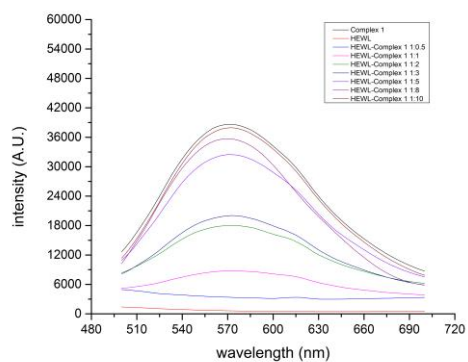

A

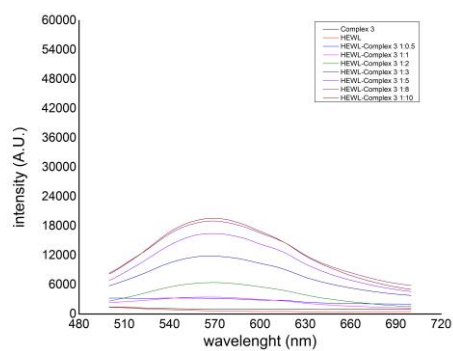

B

**Fig. S9** Fluorescence spectra of HEWL (0.05 mg/mL in 10% ethanol) in the presence of increasing concentration of complex **1** (A) and complex **3** (B) upon excitation at 375nm.

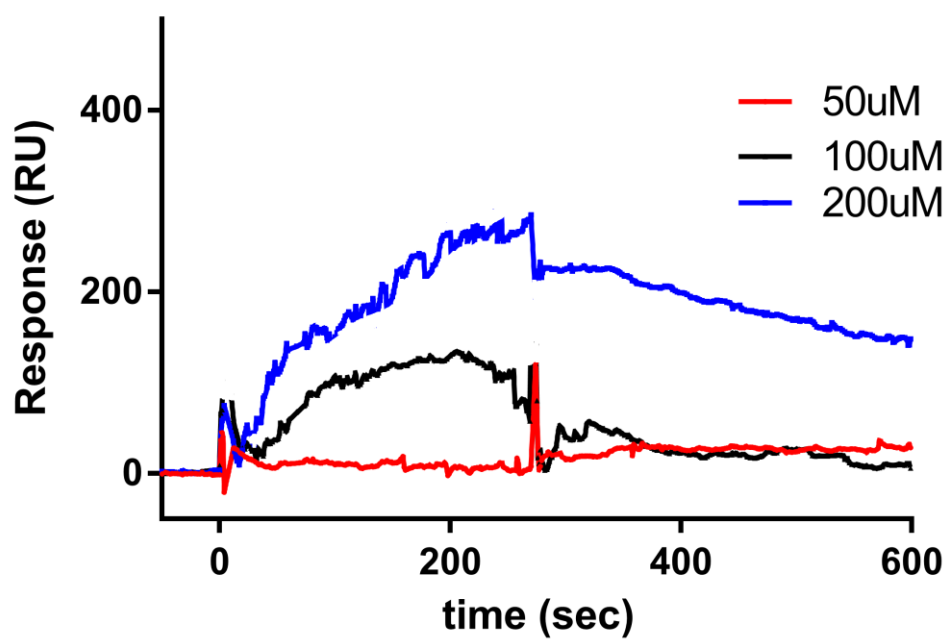

**Fig. S10:** Overlay of sensorgrams for the interaction between compound **3** and HEWL at 50, 100 and 200  $\mu\text{M}$ .

**Table S1** Crystallographic data and structural refinement details of **1–3**.

| Compound                                                     | 1                                                                | 2                                                                | 3                                                                                              |
|--------------------------------------------------------------|------------------------------------------------------------------|------------------------------------------------------------------|------------------------------------------------------------------------------------------------|
| Empirical formula                                            | C <sub>22</sub> H <sub>21</sub> N <sub>2</sub> O <sub>5</sub> Re | C <sub>22</sub> H <sub>17</sub> N <sub>2</sub> O <sub>5</sub> Re | C <sub>58</sub> H <sub>46</sub> Fe <sub>2</sub> N <sub>4</sub> O <sub>10</sub> Re <sub>2</sub> |
| Formula weight                                               | 579.61                                                           | 575.58                                                           | 1443.09                                                                                        |
| Temperature/K                                                | 100(2)                                                           | 100(2)                                                           | 100                                                                                            |
| Crystal system                                               | Monoclinic                                                       | Monoclinic                                                       | Monoclinic                                                                                     |
| Space group                                                  | P2 <sub>1</sub> /n                                               | P2 <sub>1</sub> /n+                                              | P2 <sub>1</sub>                                                                                |
| <i>a</i> /Å                                                  | 6.32177(7)                                                       | 6.19383(14)                                                      | 10.61239(10)                                                                                   |
| <i>b</i> /Å                                                  | 18.8683(2)                                                       | 19.0776(5)                                                       | 22.5597(2)                                                                                     |
| <i>c</i> /Å                                                  | 17.3727(2)                                                       | 17.0999(4)                                                       | 10.88573(11)                                                                                   |
| $\beta$ /°                                                   | 94.4130(11)                                                      | 98.541(2)                                                        | 98.2886(10)                                                                                    |
| Volume/Å <sup>3</sup>                                        | 2066.08(4)                                                       | 1998.18(8)                                                       | 2578.95(4)                                                                                     |
| <i>Z</i>                                                     | 4                                                                | 4                                                                | 2                                                                                              |
| $\rho_{\text{calc}}/\text{g/cm}^3$                           | 1.863                                                            | 1.913                                                            | 1.858                                                                                          |
| $\mu/\text{mm}^{-1}$                                         | 5.918                                                            | 6.119                                                            | 5.295                                                                                          |
| <i>F</i> (000)                                               | 1128.0                                                           | 1112.0                                                           | 1408.0                                                                                         |
| Crystal size/mm <sup>3</sup>                                 | 0.34 × 0.09 × 0.05                                               | 0.17 × 0.12 × 0.05                                               | 0.46 × 0.20 × 0.07                                                                             |
| Radiation                                                    | MoK $\alpha$ ( $\lambda$ = 0.71073 Å)                            | MoK $\alpha$ ( $\lambda$ = 0.71073 Å)                            | MoK $\alpha$ ( $\lambda$ = 0.71073 Å)                                                          |
| 2 $\theta$ range for data collection/°                       | 3.2 to 61.02                                                     | 3.22 to 61.02                                                    | 3.78 to 61.02                                                                                  |
| Index ranges                                                 | -9 ≤ <i>h</i> ≤ 9, -26 ≤ <i>k</i> ≤ 26, -24 ≤ <i>l</i> ≤ 24      | -8 ≤ <i>h</i> ≤ 8, -22 ≤ <i>k</i> ≤ 27, -24 ≤ <i>l</i> ≤ 24      | -15 ≤ <i>h</i> ≤ 15, -32 ≤ <i>k</i> ≤ 32, -15 ≤ <i>l</i> ≤ 15                                  |
| Reflections collected                                        | 98524                                                            | 19724of                                                          | 125300                                                                                         |
| Independent reflections                                      | 6298 [R <sub>int</sub> = 0.0529, R <sub>sigma</sub> = 0.0172]    | 6097 [R <sub>int</sub> = 0.0291, R <sub>sigma</sub> = 0.0292]    | 15747 [R <sub>int</sub> = 0.0719, R <sub>sigma</sub> = 0.0338]                                 |
| Data/restraints/parameters                                   | 6298/0/319                                                       | 6097/0/271                                                       | 15747/1/685                                                                                    |
| Goodness-of-fit on <i>F</i> <sup>2</sup>                     | 1.072                                                            | 1.169                                                            | 1.053                                                                                          |
| Final <i>R</i> indexes [ <i>I</i> > 2 $\sigma$ ( <i>I</i> )] | <i>R</i> <sub>1</sub> = 0.0160, w <i>R</i> <sub>2</sub> = 0.0392 | <i>R</i> <sub>1</sub> = 0.0309, w <i>R</i> <sub>2</sub> = 0.0629 | <i>R</i> <sub>1</sub> = 0.0237, w <i>R</i> <sub>2</sub> = 0.0564                               |
| Final <i>R</i> indexes [all data]                            | <i>R</i> <sub>1</sub> = 0.0176, w <i>R</i> <sub>2</sub> = 0.0399 | <i>R</i> <sub>1</sub> = 0.0348, w <i>R</i> <sub>2</sub> = 0.0643 | <i>R</i> <sub>1</sub> = 0.0244, w <i>R</i> <sub>2</sub> = 0.0571                               |
| Largest diff. peak/hole / e Å <sup>-3</sup>                  | 1.25/-0.97                                                       | 3.67/-1.50                                                       | 1.89/-0.91                                                                                     |

**Table S2.** Bond lengths for **1**.

| Atom | Atom | Length/Å   | Atom | Atom | Length/Å   |
|------|------|------------|------|------|------------|
| C1   | O1   | 1.154(2)   | C14  | N1   | 1.363(2)   |
| C1   | Re1  | 1.922(2)   | C15  | N2   | 1.367(2)   |
| C2   | O2   | 1.155(2)   | C16  | C17A | 1.511(6)   |
| C2   | Re1  | 1.9228(19) | C16  | C17B | 1.569(13)  |
| C3   | O3   | 1.164(2)   | C16  | O4   | 1.297(2)   |
| C3   | Re1  | 1.9002(17) | C16  | O5   | 1.230(2)   |
| C4   | C5   | 1.402(3)   | C17A | C18A | 1.537(7)   |
| C4   | N1   | 1.337(2)   | C17B | C18B | 1.509(15)  |
| C5   | C6   | 1.373(3)   | C18A | C19A | 1.538(5)   |
| C6   | C7   | 1.413(3)   | C18B | C19B | 1.528(9)   |
| C7   | C8   | 1.433(3)   | C19A | C20  | 1.446(4)   |
| C7   | C14  | 1.411(2)   | C19B | C20  | 1.465(6)   |
| C8   | C9   | 1.354(3)   | C20  | C21A | 1.498(4)   |
| C9   | C10  | 1.440(3)   | C20  | C21B | 1.432(6)   |
| C10  | C11  | 1.411(3)   | C21A | C22A | 1.488(7)   |
| C10  | C15  | 1.401(2)   | C21B | C22B | 1.520(9)   |
| C11  | C12  | 1.374(3)   | N1   | Re1  | 2.1762(15) |
| C12  | C13  | 1.402(3)   | N2   | Re1  | 2.1838(15) |
| C13  | N2   | 1.334(2)   | O4   | Re1  | 2.1420(12) |
| C14  | C15  | 1.435(2)   |      |      |            |



**Table S3** Valence angles for **1**.

| Atom | Atom | Atom | Angle/°    | Atom | Atom | Atom | Angle/°    |
|------|------|------|------------|------|------|------|------------|
| O1   | C1   | Re1  | 177.23(18) | C20  | C19A | C18A | 118.2(3)   |
| O2   | C2   | Re1  | 176.33(16) | C20  | C19B | C18B | 117.8(5)   |
| O3   | C3   | Re1  | 178.18(15) | C19A | C20  | C19B | 67.1(3)    |
| N1   | C4   | C5   | 122.72(18) | C19A | C20  | C21A | 119.3(3)   |
| C6   | C5   | C4   | 119.87(17) | C19B | C20  | C21A | 152.0(3)   |
| C5   | C6   | C7   | 119.04(18) | C21B | C20  | C19A | 152.7(3)   |
| C6   | C7   | C8   | 123.37(17) | C21B | C20  | C19B | 123.1(4)   |
| C14  | C7   | C6   | 117.49(18) | C21B | C20  | C21A | 39.0(3)    |
| C14  | C7   | C8   | 119.12(17) | C22A | C21A | C20  | 117.2(4)   |
| C9   | C8   | C7   | 121.03(17) | C20  | C21B | C22B | 120.6(5)   |
| C8   | C9   | C10  | 120.99(18) | C4   | N1   | C14  | 117.85(16) |
| C11  | C10  | C9   | 123.35(17) | C4   | N1   | Re1  | 127.14(13) |
| C15  | C10  | C9   | 119.16(16) | C14  | N1   | Re1  | 115.00(11) |
| C15  | C10  | C11  | 117.49(16) | C13  | N2   | C15  | 118.19(15) |
| C12  | C11  | C10  | 119.25(17) | C13  | N2   | Re1  | 127.12(12) |
| C11  | C12  | C13  | 119.80(16) | C15  | N2   | Re1  | 114.63(11) |
| N2   | C13  | C12  | 122.31(16) | C16  | O4   | Re1  | 124.31(11) |
| C7   | C14  | C15  | 119.73(16) | C1   | Re1  | C2   | 89.24(8)   |
| N1   | C14  | C7   | 123.03(16) | C1   | Re1  | N1   | 96.42(7)   |
| N1   | C14  | C15  | 117.24(14) | C1   | Re1  | N2   | 171.79(7)  |
| C10  | C15  | C14  | 119.91(15) | C1   | Re1  | O4   | 95.58(7)   |
| N2   | C15  | C10  | 122.96(15) | C2   | Re1  | N1   | 174.23(7)  |
| N2   | C15  | C14  | 117.13(15) | C2   | Re1  | N2   | 98.36(7)   |
| C17A | C16  | C17B | 17.1(3)    | C2   | Re1  | O4   | 96.98(6)   |
| O4   | C16  | C17A | 113.8(3)   | C3   | Re1  | C1   | 87.35(8)   |
| O4   | C16  | C17B | 109.6(5)   | C3   | Re1  | C2   | 87.14(7)   |
| O5   | C16  | C17A | 120.5(3)   | C3   | Re1  | N1   | 94.19(6)   |
| O5   | C16  | C17B | 124.2(5)   | C3   | Re1  | N2   | 96.08(6)   |
| O5   | C16  | O4   | 125.33(16) | C3   | Re1  | O4   | 174.96(6)  |
| C16  | C17A | C18A | 116.2(4)   | N1   | Re1  | N2   | 75.93(5)   |
| C18B | C17B | C16  | 116.9(9)   | O4   | Re1  | N1   | 81.42(5)   |
| C17A | C18A | C19A | 111.8(3)   | O4   | Re1  | N2   | 80.48(5)   |
| C17B | C18B | C19B | 111.5(7)   |      |      |      |            |

**Table S4** Torsion angles for **1**.

| A   | B   | C   | D   | Angle/°     | A    | B    | C    | D    | Angle/°     |
|-----|-----|-----|-----|-------------|------|------|------|------|-------------|
| C4  | C5  | C6  | C7  | -0.2(3)     | C15  | N2   | Re1  | C3   | -95.00(12)  |
| C4  | N1  | Re1 | C1  | 4.88(15)    | C15  | N2   | Re1  | N1   | -2.18(11)   |
| C4  | N1  | Re1 | C2  | 173.9(6)    | C15  | N2   | Re1  | O4   | 81.28(11)   |
| C4  | N1  | Re1 | C3  | -82.92(15)  | C16  | C17A | C18A | C19A | -164.9(3)   |
| C4  | N1  | Re1 | N2  | -178.14(15) | C16  | C17B | C18B | C19B | 173.8(6)    |
| C4  | N1  | Re1 | O4  | 99.59(14)   | C16  | O4   | Re1  | C1   | -115.24(15) |
| C5  | C4  | N1  | C14 | -0.6(2)     | C16  | O4   | Re1  | C2   | -25.32(15)  |
| C5  | C4  | N1  | Re1 | 178.63(13)  | C16  | O4   | Re1  | C3   | 119.3(7)    |
| C5  | C6  | C7  | C8  | 178.04(18)  | C16  | O4   | Re1  | N1   | 149.09(15)  |
| C5  | C6  | C7  | C14 | -0.4(3)     | C16  | O4   | Re1  | N2   | 72.04(14)   |
| C6  | C7  | C8  | C9  | -179.45(19) | C17A | C16  | C17B | C18B | 91(2)       |
| C6  | C7  | C14 | C15 | -178.95(16) | C17A | C16  | O4   | Re1  | -164.0(2)   |
| C6  | C7  | C14 | N1  | 0.6(3)      | C17A | C18A | C19A | C20  | -60.7(4)    |
| C7  | C8  | C9  | C10 | -1.0(3)     | C17B | C16  | C17A | C18A | -88(2)      |
| C7  | C14 | C15 | C10 | -2.1(2)     | C17B | C16  | O4   | Re1  | 178.1(4)    |
| C7  | C14 | C15 | N2  | 177.42(15)  | C17B | C18B | C19B | C20  | 60.5(8)     |
| C7  | C14 | N1  | C4  | -0.1(2)     | C18A | C19A | C20  | C19B | -38.7(3)    |
| C7  | C14 | N1  | Re1 | -179.41(13) | C18A | C19A | C20  | C21A | 171.8(3)    |
| C8  | C7  | C14 | C15 | 2.5(3)      | C18A | C19A | C20  | C21B | -157.0(6)   |
| C8  | C7  | C14 | N1  | -177.92(16) | C18B | C19B | C20  | C19A | 38.4(5)     |
| C8  | C9  | C10 | C11 | -178.15(19) | C18B | C19B | C20  | C21A | 148.2(7)    |
| C8  | C9  | C10 | C15 | 1.4(3)      | C18B | C19B | C20  | C21B | -170.4(5)   |
| C9  | C10 | C11 | C12 | 179.16(18)  | C19A | C20  | C21A | C22A | -179.5(3)   |
| C9  | C10 | C15 | C14 | 0.2(2)      | C19A | C20  | C21B | C22B | -59.9(9)    |
| C9  | C10 | C15 | N2  | -179.34(16) | C19B | C20  | C21A | C22A | 84.4(8)     |
| C10 | C11 | C12 | C13 | 0.3(3)      | C19B | C20  | C21B | C22B | -164.4(5)   |
| C10 | C15 | N2  | C13 | 0.1(2)      | C21A | C20  | C21B | C22B | -14.0(4)    |
| C10 | C15 | N2  | Re1 | -177.46(13) | C21B | C20  | C21A | C22A | 22.7(5)     |
| C11 | C10 | C15 | C14 | 179.72(16)  | N1   | C4   | C5   | C6   | 0.7(3)      |
| C11 | C10 | C15 | N2  | 0.2(3)      | N1   | C14  | C15  | C10  | 178.32(15)  |
| C11 | C12 | C13 | N2  | 0.0(3)      | N1   | C14  | C15  | N2   | -2.2(2)     |
| C12 | C13 | N2  | C15 | -0.2(2)     | O1   | C1   | Re1  | C2   | 132(4)      |
| C12 | C13 | N2  | Re1 | 176.99(12)  | O1   | C1   | Re1  | C3   | 45(4)       |
| C13 | N2  | Re1 | C1  | -157.9(4)   | O1   | C1   | Re1  | N1   | -49(4)      |
| C13 | N2  | Re1 | C2  | -0.25(15)   | O1   | C1   | Re1  | N2   | -70(4)      |
| C13 | N2  | Re1 | C3  | 87.74(15)   | O1   | C1   | Re1  | O4   | -131(4)     |
| C13 | N2  | Re1 | N1  | -179.44(15) | O2   | C2   | Re1  | C1   | -77(3)      |
| C13 | N2  | Re1 | O4  | -95.98(14)  | O2   | C2   | Re1  | C3   | 11(3)       |
| C14 | C7  | C8  | C9  | -1.0(3)     | O2   | C2   | Re1  | N1   | 114(3)      |
| C14 | C15 | N2  | C13 | -179.45(15) | O2   | C2   | Re1  | N2   | 106(3)      |

|     |     |     |     |             |    |     |      |      |           |
|-----|-----|-----|-----|-------------|----|-----|------|------|-----------|
| C14 | C15 | N2  | Re1 | 3.03(18)    | O2 | C2  | Re1  | O4   | -172(3)   |
| C14 | N1  | Re1 | C1  | -175.91(12) | O3 | C3  | Re1  | C1   | 70(5)     |
| C14 | N1  | Re1 | C2  | -6.9(7)     | O3 | C3  | Re1  | C2   | -19(5)    |
| C14 | N1  | Re1 | C3  | 96.29(12)   | O3 | C3  | Re1  | N1   | 167(5)    |
| C14 | N1  | Re1 | N2  | 1.06(11)    | O3 | C3  | Re1  | N2   | -117(5)   |
| C14 | N1  | Re1 | O4  | -81.20(12)  | O3 | C3  | Re1  | O4   | -164(4)   |
| C15 | C10 | C11 | C12 | -0.4(3)     | O4 | C16 | C17A | C18A | -167.0(3) |
| C15 | C14 | N1  | C4  | 179.44(15)  | O4 | C16 | C17B | C18B | -161.4(6) |
| C15 | C14 | N1  | Re1 | 0.15(18)    | O5 | C16 | C17A | C18A | 20.1(5)   |
| C15 | N2  | Re1 | C1  | 19.4(5)     | O5 | C16 | C17B | C18B | 8.4(9)    |
| C15 | N2  | Re1 | C2  | 177.01(12)  | O5 | C16 | O4   | Re1  | 8.4(3)    |

**Table S5** Bond lengths for **2**.

| Atom | Atom | Length/Å | Atom | Atom | Length/Å |
|------|------|----------|------|------|----------|
| C1   | O1   | 1.151(5) | C12  | C13  | 1.402(5) |
| C1   | Re1  | 1.924(4) | C13  | N2   | 1.333(4) |
| C2   | O2   | 1.152(4) | C14  | C15  | 1.430(4) |
| C2   | Re1  | 1.926(3) | C14  | N1   | 1.366(4) |
| C3   | O3   | 1.165(4) | C15  | N2   | 1.370(4) |
| C3   | Re1  | 1.903(3) | C16  | C17  | 1.512(5) |
| C4   | C5   | 1.401(5) | C16  | O4   | 1.295(4) |
| C4   | N1   | 1.334(4) | C16  | O5   | 1.234(4) |
| C5   | C6   | 1.373(5) | C17  | C18  | 1.528(5) |
| C6   | C7   | 1.409(5) | C18  | C19  | 1.515(5) |
| C7   | C8   | 1.433(5) | C19  | C20  | 1.530(6) |
| C7   | C14  | 1.405(4) | C20  | C21  | 1.471(6) |
| C8   | C9   | 1.356(5) | C21  | C22  | 1.174(6) |
| C9   | C10  | 1.438(5) | N1   | Re1  | 2.173(3) |
| C10  | C11  | 1.406(5) | N2   | Re1  | 2.185(3) |
| C10  | C15  | 1.403(5) | O4   | Re1  | 2.146(2) |
| C11  | C12  | 1.374(5) |      |      |          |

**Table S6** Valence angles for **2**.

| Atom | Atom | Atom | Angle/°  | Atom | Atom | Atom | Angle/°    |
|------|------|------|----------|------|------|------|------------|
| O1   | C1   | Re1  | 177.8(3) | C19  | C18  | C17  | 112.2(3)   |
| O2   | C2   | Re1  | 176.7(3) | C18  | C19  | C20  | 111.4(4)   |
| O3   | C3   | Re1  | 178.2(3) | C21  | C20  | C19  | 112.4(4)   |
| N1   | C4   | C5   | 122.6(3) | C22  | C21  | C20  | 177.8(6)   |
| C6   | C5   | C4   | 119.7(3) | C4   | N1   | C14  | 118.1(3)   |
| C5   | C6   | C7   | 119.1(3) | C4   | N1   | Re1  | 126.9(2)   |
| C6   | C7   | C8   | 123.3(3) | C14  | N1   | Re1  | 115.0(2)   |
| C14  | C7   | C6   | 117.7(3) | C13  | N2   | C15  | 118.1(3)   |
| C14  | C7   | C8   | 119.0(3) | C13  | N2   | Re1  | 127.2(2)   |
| C9   | C8   | C7   | 120.8(3) | C15  | N2   | Re1  | 114.4(2)   |
| C8   | C9   | C10  | 121.3(3) | C16  | O4   | Re1  | 122.2(2)   |
| C11  | C10  | C9   | 123.7(3) | C1   | Re1  | C2   | 90.05(15)  |
| C15  | C10  | C9   | 118.7(3) | C1   | Re1  | N1   | 97.26(13)  |
| C15  | C10  | C11  | 117.6(3) | C1   | Re1  | N2   | 171.41(13) |
| C12  | C11  | C10  | 119.4(3) | C1   | Re1  | O4   | 94.89(13)  |
| C11  | C12  | C13  | 119.6(3) | C2   | Re1  | N1   | 172.51(13) |
| N2   | C13  | C12  | 122.5(3) | C2   | Re1  | N2   | 96.67(13)  |
| C7   | C14  | C15  | 120.0(3) | C2   | Re1  | O4   | 97.00(12)  |
| N1   | C14  | C7   | 122.8(3) | C3   | Re1  | C1   | 86.68(15)  |
| N1   | C14  | C15  | 117.2(3) | C3   | Re1  | C2   | 88.05(15)  |
| C10  | C15  | C14  | 120.1(3) | C3   | Re1  | N1   | 93.96(12)  |
| N2   | C15  | C10  | 122.8(3) | C3   | Re1  | N2   | 98.87(12)  |
| N2   | C15  | C14  | 117.1(3) | C3   | Re1  | O4   | 174.70(12) |
| O4   | C16  | C17  | 115.1(3) | N1   | Re1  | N2   | 75.90(10)  |
| O5   | C16  | C17  | 119.7(3) | O4   | Re1  | N1   | 80.83(9)   |
| O5   | C16  | O4   | 125.0(3) | O4   | Re1  | N2   | 79.01(10)  |
| C16  | C17  | C18  | 108.8(3) |      |      |      |            |

**Table S7** Torsion angles for **2**.

| A   | B   | C   | D   | Angle/°   | A   | B   | C   | D   | Angle/°   |
|-----|-----|-----|-----|-----------|-----|-----|-----|-----|-----------|
| C4  | C5  | C6  | C7  | -0.4(5)   | C14 | N1  | Re1 | C3  | 101.9(2)  |
| C4  | N1  | Re1 | C1  | 8.6(3)    | C14 | N1  | Re1 | N2  | 3.7(2)    |
| C4  | N1  | Re1 | C2  | 176.1(9)  | C14 | N1  | Re1 | O4  | -77.2(2)  |
| C4  | N1  | Re1 | C3  | -78.6(3)  | C15 | C10 | C11 | C12 | -0.9(5)   |
| C4  | N1  | Re1 | N2  | -176.7(3) | C15 | C14 | N1  | C4  | 178.5(3)  |
| C4  | N1  | Re1 | O4  | 102.4(3)  | C15 | C14 | N1  | Re1 | -1.9(4)   |
| C5  | C4  | N1  | C14 | 0.3(5)    | C15 | N2  | Re1 | C1  | 32.7(9)   |
| C5  | C4  | N1  | Re1 | -179.3(2) | C15 | N2  | Re1 | C2  | 173.9(2)  |
| C5  | C6  | C7  | C8  | 177.9(3)  | C15 | N2  | Re1 | C3  | -97.0(2)  |
| C5  | C6  | C7  | C14 | -0.8(5)   | C15 | N2  | Re1 | N1  | -5.2(2)   |
| C6  | C7  | C8  | C9  | 179.8(3)  | C15 | N2  | Re1 | O4  | 78.0(2)   |
| C6  | C7  | C14 | C15 | -178.3(3) | C16 | C17 | C18 | C19 | -176.2(3) |
| C6  | C7  | C14 | N1  | 1.8(5)    | C16 | O4  | Re1 | C1  | -116.4(3) |
| C7  | C8  | C9  | C10 | -0.5(5)   | C16 | O4  | Re1 | C2  | -25.7(3)  |
| C7  | C14 | C15 | C10 | -2.4(5)   | C16 | O4  | Re1 | C3  | 136.6(12) |
| C7  | C14 | C15 | N2  | 177.2(3)  | C16 | O4  | Re1 | N1  | 147.0(3)  |
| C7  | C14 | N1  | C4  | -1.5(5)   | C16 | O4  | Re1 | N2  | 69.7(3)   |
| C7  | C14 | N1  | Re1 | 178.1(2)  | C17 | C16 | O4  | Re1 | -165.8(2) |
| C8  | C7  | C14 | C15 | 2.9(5)    | C17 | C18 | C19 | C20 | 179.8(3)  |
| C8  | C7  | C14 | N1  | -177.0(3) | C18 | C19 | C20 | C21 | -66.1(5)  |
| C8  | C9  | C10 | C11 | -179.0(3) | C19 | C20 | C21 | C22 | -36(14)   |
| C8  | C9  | C10 | C15 | 1.0(5)    | N1  | C4  | C5  | C6  | 0.6(5)    |
| C9  | C10 | C11 | C12 | 179.1(3)  | N1  | C14 | C15 | C10 | 177.5(3)  |
| C9  | C10 | C15 | C14 | 0.5(5)    | N1  | C14 | C15 | N2  | -2.8(4)   |
| C9  | C10 | C15 | N2  | -179.2(3) | O1  | C1  | Re1 | C2  | 131(9)    |
| C10 | C11 | C12 | C13 | 0.6(5)    | O1  | C1  | Re1 | C3  | 43(9)     |
| C10 | C15 | N2  | C13 | -0.4(5)   | O1  | C1  | Re1 | N1  | -51(9)    |
| C10 | C15 | N2  | Re1 | -174.3(2) | O1  | C1  | Re1 | N2  | -88(9)    |
| C11 | C10 | C15 | C14 | -179.5(3) | O1  | C1  | Re1 | O4  | -132(9)   |
| C11 | C10 | C15 | N2  | 0.8(5)    | O2  | C2  | Re1 | C1  | -105(6)   |
| C11 | C12 | C13 | N2  | -0.1(5)   | O2  | C2  | Re1 | C3  | -19(6)    |
| C12 | C13 | N2  | C15 | 0.0(5)    | O2  | C2  | Re1 | N1  | 87(6)     |
| C12 | C13 | N2  | Re1 | 173.1(2)  | O2  | C2  | Re1 | N2  | 80(6)     |
| C13 | N2  | Re1 | C1  | -140.6(8) | O2  | C2  | Re1 | O4  | 160(6)    |
| C13 | N2  | Re1 | C2  | 0.6(3)    | O3  | C3  | Re1 | C1  | 3(10)     |
| C13 | N2  | Re1 | C3  | 89.6(3)   | O3  | C3  | Re1 | C2  | -87(10)   |
| C13 | N2  | Re1 | N1  | -178.5(3) | O3  | C3  | Re1 | N1  | 101(10)   |
| C13 | N2  | Re1 | O4  | -95.3(3)  | O3  | C3  | Re1 | N2  | 177(100)  |

|     |     |     |     |           |    |     |     |     |          |
|-----|-----|-----|-----|-----------|----|-----|-----|-----|----------|
| C14 | C7  | C8  | C9  | -1.5(5)   | O3 | C3  | Re1 | O4  | 111(10)  |
| C14 | C15 | N2  | C13 | 180.0(3)  | O4 | C16 | C17 | C18 | 97.6(4)  |
| C14 | C15 | N2  | Re1 | 6.0(4)    | O5 | C16 | C17 | C18 | -78.5(4) |
| C14 | N1  | Re1 | C1  | -171.0(2) | O5 | C16 | O4  | Re1 | 10.1(5)  |
| C14 | N1  | Re1 | C2  | -3.5(11)  |    |     |     |     |          |

**Table S8** Bond lengths for **3**.

| Atom | Atom | Length/Å | Atom | Atom | Length/Å |
|------|------|----------|------|------|----------|
| C1A  | O1A  | 1.164(4) | C1B  | O1B  | 1.174(5) |
| C1A  | Re1A | 1.903(4) | C1B  | Re1B | 1.901(4) |
| C2A  | O2A  | 1.160(4) | C2B  | O2B  | 1.167(5) |
| C2A  | Re1A | 1.917(3) | C2B  | Re1B | 1.911(4) |
| C3A  | O3A  | 1.157(4) | C3B  | O3B  | 1.152(4) |
| C3A  | Re1A | 1.910(3) | C3B  | Re1B | 1.919(4) |
| C4A  | C5A  | 1.401(5) | C4B  | C5B  | 1.396(5) |
| C4A  | N1A  | 1.332(4) | C4B  | N1B  | 1.331(4) |
| C5A  | C6A  | 1.372(5) | C5B  | C6B  | 1.369(5) |
| C6A  | C7A  | 1.405(4) | C6B  | C7B  | 1.411(4) |
| C7A  | C8A  | 1.426(5) | C7B  | C8B  | 1.435(4) |
| C7A  | C14A | 1.411(4) | C7B  | C14B | 1.404(4) |
| C8A  | C9A  | 1.360(5) | C8B  | C9B  | 1.353(5) |
| C9A  | C10A | 1.435(4) | C9B  | C10B | 1.431(5) |
| C10A | C11A | 1.420(4) | C10B | C11B | 1.403(5) |
| C10A | C15A | 1.402(4) | C10B | C15B | 1.409(4) |
| C11A | C12A | 1.372(5) | C11B | C12B | 1.369(5) |
| C12A | C13A | 1.398(4) | C12B | C13B | 1.408(5) |
| C13A | N2A  | 1.341(4) | C13B | N2B  | 1.342(4) |
| C14A | C15A | 1.432(4) | C14B | C15B | 1.434(4) |
| C14A | N1A  | 1.363(4) | C14B | N1B  | 1.357(4) |
| C15A | N2A  | 1.361(4) | C15B | N2B  | 1.368(4) |
| C16A | C17A | 1.529(4) | C16B | C17B | 1.529(5) |
| C16A | O4A  | 1.301(4) | C16B | O4B  | 1.286(4) |
| C16A | O5A  | 1.224(4) | C16B | O5B  | 1.234(4) |
| C17A | C18A | 1.534(5) | C17B | C18B | 1.528(5) |
| C18A | C19A | 1.531(4) | C18B | C19B | 1.528(4) |
| C19A | C20A | 1.507(5) | C19B | C20B | 1.510(4) |
| C20A | C21A | 1.423(5) | C20B | C21B | 1.431(4) |
| C20A | C24A | 1.424(4) | C20B | C24B | 1.429(4) |
| C20A | Fe1A | 2.060(3) | C20B | Fe1B | 2.058(3) |
| C21A | C22A | 1.435(5) | C21B | C22B | 1.425(5) |
| C21A | Fe1A | 2.043(3) | C21B | Fe1B | 2.040(4) |
| C22A | C23A | 1.420(5) | C22B | C23B | 1.435(5) |
| C22A | Fe1A | 2.047(3) | C22B | Fe1B | 2.048(3) |
| C23A | C24A | 1.436(5) | C23B | C24B | 1.414(5) |
| C23A | Fe1A | 2.055(3) | C23B | Fe1B | 2.046(3) |
| C24A | Fe1A | 2.058(3) | C24B | Fe1B | 2.046(3) |
| C25A | C26A | 1.426(5) | C25B | C26B | 1.421(5) |
| C25A | C29A | 1.429(5) | C25B | C29B | 1.432(5) |

---

|      |      |          |      |      |          |
|------|------|----------|------|------|----------|
| C25A | Fe1A | 2.047(3) | C25B | Fe1B | 2.036(3) |
| C26A | C27A | 1.424(5) | C26B | C27B | 1.418(5) |
| C26A | Fe1A | 2.052(3) | C26B | Fe1B | 2.044(3) |
| C27A | C28A | 1.426(5) | C27B | C28B | 1.427(5) |
| C27A | Fe1A | 2.048(3) | C27B | Fe1B | 2.052(4) |
| C28A | C29A | 1.420(5) | C28B | C29B | 1.425(5) |
| C28A | Fe1A | 2.051(3) | C28B | Fe1B | 2.058(4) |
| C29A | Fe1A | 2.043(3) | C29B | Fe1B | 2.052(3) |
| N1A  | Re1A | 2.177(3) | N1B  | Re1B | 2.181(3) |
| N2A  | Re1A | 2.175(3) | N2B  | Re1B | 2.180(3) |
| O4A  | Re1A | 2.125(2) | O4B  | Re1B | 2.129(2) |

---



**Table S9** Valence angles for **3**.

| Atom | Atom | Atom | Angle/°   | Atom | Atom | Atom | Angle/°   |
|------|------|------|-----------|------|------|------|-----------|
| O1A  | C1A  | Re1A | 179.1(3)  | O1B  | C1B  | Re1B | 174.4(4)  |
| O2A  | C2A  | Re1A | 175.4(3)  | O2B  | C2B  | Re1B | 178.2(3)  |
| O3A  | C3A  | Re1A | 177.9(3)  | O3B  | C3B  | Re1B | 176.1(3)  |
| N1A  | C4A  | C5A  | 122.1(3)  | N1B  | C4B  | C5B  | 123.5(3)  |
| C6A  | C5A  | C4A  | 119.8(3)  | C6B  | C5B  | C4B  | 119.1(3)  |
| C5A  | C6A  | C7A  | 119.5(3)  | C5B  | C6B  | C7B  | 119.3(3)  |
| C6A  | C7A  | C8A  | 123.8(3)  | C6B  | C7B  | C8B  | 123.5(3)  |
| C6A  | C7A  | C14A | 117.5(3)  | C14B | C7B  | C6B  | 117.6(3)  |
| C14A | C7A  | C8A  | 118.8(3)  | C14B | C7B  | C8B  | 118.9(3)  |
| C9A  | C8A  | C7A  | 121.2(3)  | C9B  | C8B  | C7B  | 121.4(3)  |
| C8A  | C9A  | C10A | 120.9(3)  | C8B  | C9B  | C10B | 120.8(3)  |
| C11A | C10A | C9A  | 123.8(3)  | C11B | C10B | C9B  | 123.4(3)  |
| C15A | C10A | C9A  | 119.1(3)  | C11B | C10B | C15B | 117.5(3)  |
| C15A | C10A | C11A | 117.1(3)  | C15B | C10B | C9B  | 119.2(3)  |
| C12A | C11A | C10A | 119.1(3)  | C12B | C11B | C10B | 120.0(3)  |
| C11A | C12A | C13A | 120.0(3)  | C11B | C12B | C13B | 119.2(3)  |
| N2A  | C13A | C12A | 122.3(3)  | N2B  | C13B | C12B | 122.7(3)  |
| C7A  | C14A | C15A | 120.2(3)  | C7B  | C14B | C15B | 119.8(3)  |
| N1A  | C14A | C7A  | 122.4(3)  | N1B  | C14B | C7B  | 122.9(3)  |
| N1A  | C14A | C15A | 117.4(3)  | N1B  | C14B | C15B | 117.3(3)  |
| C10A | C15A | C14A | 119.8(3)  | C10B | C15B | C14B | 119.8(3)  |
| N2A  | C15A | C10A | 123.4(3)  | N2B  | C15B | C10B | 122.8(3)  |
| N2A  | C15A | C14A | 116.8(3)  | N2B  | C15B | C14B | 117.3(3)  |
| O4A  | C16A | C17A | 112.7(3)  | O4B  | C16B | C17B | 114.2(3)  |
| O5A  | C16A | C17A | 121.6(3)  | O5B  | C16B | C17B | 120.2(3)  |
| O5A  | C16A | O4A  | 125.7(3)  | O5B  | C16B | O4B  | 125.5(3)  |
| C16A | C17A | C18A | 111.7(3)  | C18B | C17B | C16B | 114.9(3)  |
| C19A | C18A | C17A | 110.8(3)  | C17B | C18B | C19B | 112.2(3)  |
| C20A | C19A | C18A | 115.0(3)  | C20B | C19B | C18B | 114.2(3)  |
| C19A | C20A | Fe1A | 128.3(2)  | C19B | C20B | Fe1B | 128.9(2)  |
| C21A | C20A | C19A | 129.6(3)  | C21B | C20B | C19B | 128.3(3)  |
| C21A | C20A | C24A | 107.4(3)  | C21B | C20B | Fe1B | 68.87(19) |
| C21A | C20A | Fe1A | 69.09(19) | C24B | C20B | C19B | 125.1(3)  |
| C24A | C20A | C19A | 123.0(3)  | C24B | C20B | C21B | 106.6(3)  |
| C24A | C20A | Fe1A | 69.68(18) | C24B | C20B | Fe1B | 69.18(19) |
| C20A | C21A | C22A | 108.8(3)  | C20B | C21B | Fe1B | 70.26(19) |
| C20A | C21A | Fe1A | 70.33(18) | C22B | C21B | C20B | 109.0(3)  |
| C22A | C21A | Fe1A | 69.57(18) | C22B | C21B | Fe1B | 69.9(2)   |
| C21A | C22A | Fe1A | 69.34(19) | C21B | C22B | C23B | 107.4(3)  |
| C23A | C22A | C21A | 107.5(3)  | C21B | C22B | Fe1B | 69.28(19) |

|      |      |      |            |      |      |      |            |
|------|------|------|------------|------|------|------|------------|
| C23A | C22A | Fe1A | 70.07(18)  | C23B | C22B | Fe1B | 69.42(19)  |
| C22A | C23A | C24A | 108.0(3)   | C22B | C23B | Fe1B | 69.53(19)  |
| C22A | C23A | Fe1A | 69.41(18)  | C24B | C23B | C22B | 107.8(3)   |
| C24A | C23A | Fe1A | 69.64(18)  | C24B | C23B | Fe1B | 69.78(18)  |
| C20A | C24A | C23A | 108.4(3)   | C20B | C24B | Fe1B | 70.07(19)  |
| C20A | C24A | Fe1A | 69.85(18)  | C23B | C24B | C20B | 109.2(3)   |
| C23A | C24A | Fe1A | 69.47(18)  | C23B | C24B | Fe1B | 69.78(19)  |
| C26A | C25A | C29A | 107.9(3)   | C26B | C25B | C29B | 107.9(3)   |
| C26A | C25A | Fe1A | 69.83(19)  | C26B | C25B | Fe1B | 69.93(19)  |
| C29A | C25A | Fe1A | 69.42(18)  | C29B | C25B | Fe1B | 70.10(19)  |
| C25A | C26A | Fe1A | 69.45(18)  | C25B | C26B | Fe1B | 69.31(19)  |
| C27A | C26A | C25A | 108.0(3)   | C27B | C26B | C25B | 108.5(3)   |
| C27A | C26A | Fe1A | 69.54(18)  | C27B | C26B | Fe1B | 70.0(2)    |
| C26A | C27A | C28A | 107.9(3)   | C26B | C27B | C28B | 107.8(3)   |
| C26A | C27A | Fe1A | 69.81(19)  | C26B | C27B | Fe1B | 69.4(2)    |
| C28A | C27A | Fe1A | 69.75(19)  | C28B | C27B | Fe1B | 69.9(2)    |
| C27A | C28A | Fe1A | 69.54(19)  | C27B | C28B | Fe1B | 69.5(2)    |
| C29A | C28A | C27A | 108.3(3)   | C29B | C28B | C27B | 108.2(3)   |
| C29A | C28A | Fe1A | 69.42(18)  | C29B | C28B | Fe1B | 69.50(19)  |
| C25A | C29A | Fe1A | 69.67(18)  | C25B | C29B | Fe1B | 68.88(19)  |
| C28A | C29A | C25A | 107.9(3)   | C28B | C29B | C25B | 107.6(3)   |
| C28A | C29A | Fe1A | 70.00(19)  | C28B | C29B | Fe1B | 69.9(2)    |
| C21A | Fe1A | C20A | 40.58(13)  | C21B | Fe1B | C20B | 40.87(13)  |
| C21A | Fe1A | C22A | 41.09(14)  | C21B | Fe1B | C22B | 40.81(13)  |
| C21A | Fe1A | C23A | 68.36(13)  | C21B | Fe1B | C23B | 68.68(14)  |
| C21A | Fe1A | C24A | 68.05(13)  | C21B | Fe1B | C24B | 68.29(14)  |
| C21A | Fe1A | C25A | 119.73(14) | C21B | Fe1B | C26B | 106.70(14) |
| C21A | Fe1A | C26A | 107.30(13) | C21B | Fe1B | C27B | 126.01(14) |
| C21A | Fe1A | C27A | 125.45(14) | C21B | Fe1B | C28B | 164.30(14) |
| C21A | Fe1A | C28A | 163.05(15) | C21B | Fe1B | C29B | 153.09(14) |
| C22A | Fe1A | C20A | 68.92(14)  | C22B | Fe1B | C20B | 68.95(14)  |
| C22A | Fe1A | C23A | 40.51(13)  | C22B | Fe1B | C27B | 107.19(15) |
| C22A | Fe1A | C24A | 68.53(14)  | C22B | Fe1B | C28B | 127.18(15) |
| C22A | Fe1A | C25A | 155.23(14) | C22B | Fe1B | C29B | 165.22(14) |
| C22A | Fe1A | C26A | 120.49(14) | C23B | Fe1B | C20B | 68.78(13)  |
| C22A | Fe1A | C27A | 107.77(14) | C23B | Fe1B | C22B | 41.04(14)  |
| C22A | Fe1A | C28A | 125.76(15) | C23B | Fe1B | C24B | 40.44(13)  |
| C23A | Fe1A | C20A | 68.62(13)  | C23B | Fe1B | C27B | 119.49(14) |
| C23A | Fe1A | C24A | 40.88(13)  | C23B | Fe1B | C28B | 108.74(14) |
| C24A | Fe1A | C20A | 40.47(12)  | C23B | Fe1B | C29B | 127.60(13) |
| C25A | Fe1A | C20A | 106.61(13) | C24B | Fe1B | C20B | 40.75(12)  |
| C25A | Fe1A | C23A | 162.49(14) | C24B | Fe1B | C22B | 68.45(14)  |
| C25A | Fe1A | C24A | 124.76(14) | C24B | Fe1B | C27B | 154.20(14) |
| C25A | Fe1A | C26A | 40.72(14)  | C24B | Fe1B | C28B | 120.51(13) |
| C25A | Fe1A | C27A | 68.56(14)  | C24B | Fe1B | C29B | 108.85(13) |
| C25A | Fe1A | C28A | 68.41(14)  | C25B | Fe1B | C20B | 106.91(13) |
| C26A | Fe1A | C20A | 124.56(13) | C25B | Fe1B | C21B | 117.98(14) |
| C26A | Fe1A | C23A | 155.78(14) | C25B | Fe1B | C22B | 152.15(14) |

|      |      |      |            |      |      |      |            |
|------|------|------|------------|------|------|------|------------|
| C26A | Fe1A | C24A | 161.64(14) | C25B | Fe1B | C23B | 165.21(14) |
| C27A | Fe1A | C20A | 161.99(13) | C25B | Fe1B | C24B | 127.32(13) |
| C27A | Fe1A | C23A | 121.13(14) | C25B | Fe1B | C26B | 40.77(14)  |
| C27A | Fe1A | C24A | 156.39(14) | C25B | Fe1B | C27B | 68.61(14)  |
| C27A | Fe1A | C26A | 40.65(14)  | C25B | Fe1B | C28B | 68.55(13)  |
| C27A | Fe1A | C28A | 40.71(13)  | C25B | Fe1B | C29B | 41.02(13)  |
| C28A | Fe1A | C20A | 155.39(14) | C26B | Fe1B | C20B | 126.01(14) |
| C28A | Fe1A | C23A | 108.49(13) | C26B | Fe1B | C22B | 118.06(15) |
| C28A | Fe1A | C24A | 121.26(13) | C26B | Fe1B | C23B | 153.11(14) |
| C28A | Fe1A | C26A | 68.33(13)  | C26B | Fe1B | C24B | 164.49(14) |
| C29A | Fe1A | C20A | 119.87(13) | C26B | Fe1B | C27B | 40.51(14)  |
| C29A | Fe1A | C21A | 154.80(14) | C26B | Fe1B | C28B | 68.18(14)  |
| C29A | Fe1A | C22A | 162.62(14) | C26B | Fe1B | C29B | 68.55(14)  |
| C29A | Fe1A | C23A | 125.60(13) | C27B | Fe1B | C20B | 163.59(13) |
| C29A | Fe1A | C24A | 107.56(13) | C27B | Fe1B | C28B | 40.64(14)  |
| C29A | Fe1A | C25A | 40.90(13)  | C27B | Fe1B | C29B | 68.54(14)  |
| C29A | Fe1A | C26A | 68.62(13)  | C28B | Fe1B | C20B | 154.06(14) |
| C29A | Fe1A | C27A | 68.63(14)  | C29B | Fe1B | C20B | 119.18(13) |
| C29A | Fe1A | C28A | 40.58(14)  | C29B | Fe1B | C28B | 40.57(14)  |
| C4A  | N1A  | C14A | 118.7(3)   | C4B  | N1B  | C14B | 117.6(3)   |
| C4A  | N1A  | Re1A | 126.6(2)   | C4B  | N1B  | Re1B | 127.3(2)   |
| C14A | N1A  | Re1A | 114.60(19) | C14B | N1B  | Re1B | 114.9(2)   |
| C13A | N2A  | C15A | 118.0(3)   | C13B | N2B  | C15B | 117.8(3)   |
| C13A | N2A  | Re1A | 126.9(2)   | C13B | N2B  | Re1B | 127.6(2)   |
| C15A | N2A  | Re1A | 115.11(18) | C15B | N2B  | Re1B | 114.5(2)   |
| C16A | O4A  | Re1A | 125.8(2)   | C16B | O4B  | Re1B | 127.2(2)   |
| C1A  | Re1A | C2A  | 89.37(14)  | C1B  | Re1B | C2B  | 90.40(17)  |
| C1A  | Re1A | C3A  | 88.52(14)  | C1B  | Re1B | C3B  | 87.55(16)  |
| C1A  | Re1A | N1A  | 97.05(12)  | C1B  | Re1B | N1B  | 93.49(14)  |
| C1A  | Re1A | N2A  | 171.83(12) | C1B  | Re1B | N2B  | 169.13(14) |
| C1A  | Re1A | O4A  | 96.39(12)  | C1B  | Re1B | O4B  | 98.50(13)  |
| C2A  | Re1A | N1A  | 173.58(12) | C2B  | Re1B | C3B  | 86.15(14)  |
| C2A  | Re1A | N2A  | 97.76(12)  | C2B  | Re1B | N1B  | 174.47(14) |
| C2A  | Re1A | O4A  | 96.84(11)  | C2B  | Re1B | N2B  | 99.96(14)  |
| C3A  | Re1A | C2A  | 86.00(14)  | C2B  | Re1B | O4B  | 95.81(13)  |
| C3A  | Re1A | N1A  | 94.31(12)  | C3B  | Re1B | N1B  | 97.92(12)  |
| C3A  | Re1A | N2A  | 95.92(12)  | C3B  | Re1B | N2B  | 96.34(13)  |
| C3A  | Re1A | O4A  | 174.35(12) | C3B  | Re1B | O4B  | 173.61(12) |
| N2A  | Re1A | N1A  | 75.83(9)   | N2B  | Re1B | N1B  | 75.95(10)  |
| O4A  | Re1A | N1A  | 82.33(9)   | O4B  | Re1B | N1B  | 79.74(10)  |
| O4A  | Re1A | N2A  | 78.88(9)   | O4B  | Re1B | N2B  | 77.34(9)   |

**Table S10** Torsion angles for **3**.

| A    | B    | C    | D    | Angle/°   | A    | B    | C    | D    | Angle/°   |
|------|------|------|------|-----------|------|------|------|------|-----------|
| C4A  | C5A  | C6A  | C7A  | 1.3(5)    | C4B  | C5B  | C6B  | C7B  | 0.0(5)    |
| C4A  | N1A  | Re1A | C1A  | 1.2(3)    | C4B  | N1B  | Re1B | C1B  | 0.2(3)    |
| C4A  | N1A  | Re1A | C2A  | 180(16)   | C4B  | N1B  | Re1B | C2B  | 134.9(13) |
| C4A  | N1A  | Re1A | C3A  | -87.8(3)  | C4B  | N1B  | Re1B | C3B  | -87.8(3)  |
| C4A  | N1A  | Re1A | N2A  | 177.2(3)  | C4B  | N1B  | Re1B | N2B  | 177.6(3)  |
| C4A  | N1A  | Re1A | O4A  | 96.8(3)   | C4B  | N1B  | Re1B | O4B  | 98.2(3)   |
| C5A  | C4A  | N1A  | C14A | -0.3(5)   | C5B  | C4B  | N1B  | C14B | 0.0(5)    |
| C5A  | C4A  | N1A  | Re1A | 178.3(2)  | C5B  | C4B  | N1B  | Re1B | -175.1(2) |
| C5A  | C6A  | C7A  | C8A  | 179.2(3)  | C5B  | C6B  | C7B  | C8B  | -178.8(3) |
| C5A  | C6A  | C7A  | C14A | -0.4(5)   | C5B  | C6B  | C7B  | C14B | 0.7(5)    |
| C6A  | C7A  | C8A  | C9A  | -177.8(3) | C6B  | C7B  | C8B  | C9B  | -178.3(4) |
| C6A  | C7A  | C14A | C15A | 177.4(3)  | C6B  | C7B  | C14B | C15B | 177.8(3)  |
| C6A  | C7A  | C14A | N1A  | -0.8(4)   | C6B  | C7B  | C14B | N1B  | -1.0(5)   |
| C7A  | C8A  | C9A  | C10A | 1.0(5)    | C7B  | C8B  | C9B  | C10B | 0.0(6)    |
| C7A  | C14A | C15A | C10A | -0.1(4)   | C7B  | C14B | C15B | C10B | 1.0(5)    |
| C7A  | C14A | C15A | N2A  | -179.2(3) | C7B  | C14B | C15B | N2B  | -178.2(3) |
| C7A  | C14A | N1A  | C4A  | 1.2(4)    | C7B  | C14B | N1B  | C4B  | 0.7(5)    |
| C7A  | C14A | N1A  | Re1A | -177.6(2) | C7B  | C14B | N1B  | Re1B | 176.4(2)  |
| C8A  | C7A  | C14A | C15A | -2.2(4)   | C8B  | C7B  | C14B | C15B | -2.6(5)   |
| C8A  | C7A  | C14A | N1A  | 179.6(3)  | C8B  | C7B  | C14B | N1B  | 178.5(3)  |
| C8A  | C9A  | C10A | C11A | 176.6(3)  | C8B  | C9B  | C10B | C11B | 177.7(4)  |
| C8A  | C9A  | C10A | C15A | -3.3(5)   | C8B  | C9B  | C10B | C15B | -1.7(5)   |
| C9A  | C10A | C11A | C12A | -179.1(3) | C9B  | C10B | C11B | C12B | -178.9(4) |
| C9A  | C10A | C15A | C14A | 2.8(4)    | C9B  | C10B | C15B | C14B | 1.1(5)    |
| C9A  | C10A | C15A | N2A  | -178.2(3) | C9B  | C10B | C15B | N2B  | -179.6(3) |
| C10A | C11A | C12A | C13A | -1.9(5)   | C10B | C11B | C12B | C13B | -1.8(5)   |
| C10A | C15A | N2A  | C13A | -3.4(4)   | C10B | C15B | N2B  | C13B | -1.0(5)   |
| C10A | C15A | N2A  | Re1A | 178.1(2)  | C10B | C15B | N2B  | Re1B | -177.8(3) |
| C11A | C10A | C15A | C14A | -177.1(3) | C11B | C10B | C15B | C14B | -178.3(3) |
| C11A | C10A | C15A | N2A  | 1.9(4)    | C11B | C10B | C15B | N2B  | 1.0(5)    |
| C11A | C12A | C13A | N2A  | 0.4(5)    | C11B | C12B | C13B | N2B  | 1.8(5)    |
| C12A | C13A | N2A  | C15A | 2.2(4)    | C12B | C13B | N2B  | C15B | -0.4(5)   |
| C12A | C13A | N2A  | Re1A | -179.5(2) | C12B | C13B | N2B  | Re1B | 175.9(3)  |
| C13A | N2A  | Re1A | C1A  | -144.9(8) | C13B | N2B  | Re1B | C1B  | -164.5(7) |
| C13A | N2A  | Re1A | C2A  | 5.7(3)    | C13B | N2B  | Re1B | C2B  | -2.3(3)   |
| C13A | N2A  | Re1A | C3A  | 92.4(3)   | C13B | N2B  | Re1B | C3B  | 84.9(3)   |
| C13A | N2A  | Re1A | N1A  | -174.6(3) | C13B | N2B  | Re1B | N1B  | -178.5(3) |
| C13A | N2A  | Re1A | O4A  | -89.8(3)  | C13B | N2B  | Re1B | O4B  | -96.0(3)  |
| C14A | C7A  | C8A  | C9A  | 1.8(5)    | C14B | C7B  | C8B  | C9B  | 2.1(5)    |
| C14A | C15A | N2A  | C13A | 175.6(3)  | C14B | C15B | N2B  | C13B | 178.3(3)  |

|      |      |      |      |             |      |      |      |      |             |
|------|------|------|------|-------------|------|------|------|------|-------------|
| C14A | C15A | N2A  | Re1A | -2.9(3)     | C14B | C15B | N2B  | Re1B | 1.5(4)      |
| C14A | N1A  | Re1A | C1A  | 179.9(2)    | C14B | N1B  | Re1B | C1B  | -175.0(2)   |
| C14A | N1A  | Re1A | C2A  | -1.6(12)    | C14B | N1B  | Re1B | C2B  | -40.3(15)   |
| C14A | N1A  | Re1A | C3A  | 90.9(2)     | C14B | N1B  | Re1B | C3B  | 97.0(2)     |
| C14A | N1A  | Re1A | N2A  | -4.11(19)   | C14B | N1B  | Re1B | N2B  | 2.4(2)      |
| C14A | N1A  | Re1A | O4A  | -84.5(2)    | C14B | N1B  | Re1B | O4B  | -77.0(2)    |
| C15A | C10A | C11A | C12A | 0.9(5)      | C15B | C10B | C11B | C12B | 0.5(5)      |
| C15A | C14A | N1A  | C4A  | -177.1(3)   | C15B | C14B | N1B  | C4B  | -178.2(3)   |
| C15A | C14A | N1A  | Re1A | 4.1(3)      | C15B | C14B | N1B  | Re1B | -2.5(4)     |
| C15A | N2A  | Re1A | C1A  | 33.4(9)     | C15B | N2B  | Re1B | C1B  | 11.9(8)     |
| C15A | N2A  | Re1A | C2A  | -176.0(2)   | C15B | N2B  | Re1B | C2B  | 174.2(2)    |
| C15A | N2A  | Re1A | C3A  | -89.3(2)    | C15B | N2B  | Re1B | C3B  | -98.7(2)    |
| C15A | N2A  | Re1A | N1A  | 3.71(19)    | C15B | N2B  | Re1B | N1B  | -2.0(2)     |
| C15A | N2A  | Re1A | O4A  | 88.5(2)     | C15B | N2B  | Re1B | O4B  | 80.4(2)     |
| C16A | C17A | C18A | C19A | -61.0(4)    | C16B | C17B | C18B | C19B | -64.5(4)    |
| C16A | O4A  | Re1A | C1A  | 35.3(3)     | C16B | O4B  | Re1B | C1B  | -21.1(3)    |
| C16A | O4A  | Re1A | C2A  | 125.5(2)    | C16B | O4B  | Re1B | C2B  | 70.2(3)     |
| C16A | O4A  | Re1A | C3A  | -114.7(11)  | C16B | O4B  | Re1B | C3B  | 178(8)      |
| C16A | O4A  | Re1A | N1A  | -61.0(2)    | C16B | O4B  | Re1B | N1B  | -113.1(3)   |
| C16A | O4A  | Re1A | N2A  | -137.9(2)   | C16B | O4B  | Re1B | N2B  | 169.1(3)    |
| C17A | C16A | O4A  | Re1A | 170.65(19)  | C17B | C16B | O4B  | Re1B | 176.4(2)    |
| C17A | C18A | C19A | C20A | 176.5(3)    | C17B | C18B | C19B | C20B | 177.5(3)    |
| C18A | C19A | C20A | C21A | -21.2(5)    | C18B | C19B | C20B | C21B | -17.5(5)    |
| C18A | C19A | C20A | C24A | 161.4(3)    | C18B | C19B | C20B | C24B | 165.7(3)    |
| C18A | C19A | C20A | Fe1A | 72.3(4)     | C18B | C19B | C20B | Fe1B | 75.2(4)     |
| C19A | C20A | C21A | C22A | -177.9(3)   | C19B | C20B | C21B | C22B | -177.0(3)   |
| C19A | C20A | C21A | Fe1A | 123.0(3)    | C19B | C20B | C21B | Fe1B | 123.6(4)    |
| C19A | C20A | C24A | C23A | 177.9(3)    | C19B | C20B | C24B | C23B | 177.4(3)    |
| C19A | C20A | C24A | Fe1A | -123.2(3)   | C19B | C20B | C24B | Fe1B | -123.7(3)   |
| C19A | C20A | Fe1A | C21A | -124.5(4)   | C19B | C20B | Fe1B | C21B | -122.8(4)   |
| C19A | C20A | Fe1A | C22A | -162.2(3)   | C19B | C20B | Fe1B | C22B | -160.1(3)   |
| C19A | C20A | Fe1A | C23A | 154.2(3)    | C19B | C20B | Fe1B | C23B | 155.7(3)    |
| C19A | C20A | Fe1A | C24A | 116.6(4)    | C19B | C20B | Fe1B | C24B | 118.9(4)    |
| C19A | C20A | Fe1A | C25A | -8.0(3)     | C19B | C20B | Fe1B | C25B | -9.3(3)     |
| C19A | C20A | Fe1A | C26A | -49.0(3)    | C19B | C20B | Fe1B | C26B | -50.0(3)    |
| C19A | C20A | Fe1A | C27A | -79.6(5)    | C19B | C20B | Fe1B | C27B | -80.8(6)    |
| C19A | C20A | Fe1A | C28A | 66.3(5)     | C19B | C20B | Fe1B | C28B | 66.3(4)     |
| C19A | C20A | Fe1A | C29A | 34.5(3)     | C19B | C20B | Fe1B | C29B | 33.5(3)     |
| C20A | C21A | C22A | C23A | 0.3(4)      | C20B | C21B | C22B | C23B | -0.4(4)     |
| C20A | C21A | C22A | Fe1A | -59.6(2)    | C20B | C21B | C22B | Fe1B | -59.6(2)    |
| C20A | C21A | Fe1A | C22A | 119.8(3)    | C20B | C21B | Fe1B | C22B | 119.9(3)    |
| C20A | C21A | Fe1A | C23A | 82.0(2)     | C20B | C21B | Fe1B | C23B | 81.8(2)     |
| C20A | C21A | Fe1A | C24A | 37.78(19)   | C20B | C21B | Fe1B | C24B | 38.18(18)   |
| C20A | C21A | Fe1A | C25A | -80.8(2)    | C20B | C21B | Fe1B | C25B | -83.7(2)    |
| C20A | C21A | Fe1A | C26A | -123.3(2)   | C20B | C21B | Fe1B | C26B | -126.3(2)   |
| C20A | C21A | Fe1A | C27A | -164.43(19) | C20B | C21B | Fe1B | C27B | -166.51(19) |
| C20A | C21A | Fe1A | C28A | 164.4(4)    | C20B | C21B | Fe1B | C28B | 165.3(5)    |
| C20A | C21A | Fe1A | C29A | -46.9(4)    | C20B | C21B | Fe1B | C29B | -50.9(4)    |

|      |      |      |      |            |      |      |      |      |            |
|------|------|------|------|------------|------|------|------|------|------------|
| C20A | C24A | Fe1A | C21A | -37.88(19) | C20B | C24B | Fe1B | C21B | -38.29(19) |
| C20A | C24A | Fe1A | C22A | -82.3(2)   | C20B | C24B | Fe1B | C22B | -82.3(2)   |
| C20A | C24A | Fe1A | C23A | -119.7(3)  | C20B | C24B | Fe1B | C23B | -120.5(3)  |
| C20A | C24A | Fe1A | C25A | 73.9(2)    | C20B | C24B | Fe1B | C25B | 71.1(2)    |
| C20A | C24A | Fe1A | C26A | 40.8(5)    | C20B | C24B | Fe1B | C26B | 35.6(6)    |
| C20A | C24A | Fe1A | C27A | -167.6(3)  | C20B | C24B | Fe1B | C27B | -167.4(3)  |
| C20A | C24A | Fe1A | C28A | 158.00(19) | C20B | C24B | Fe1B | C28B | 156.2(2)   |
| C20A | C24A | Fe1A | C29A | 115.7(2)   | C20B | C24B | Fe1B | C29B | 113.1(2)   |
| C21A | C20A | C24A | C23A | 0.0(4)     | C21B | C20B | C24B | C23B | 0.0(4)     |
| C21A | C20A | C24A | Fe1A | 59.0(2)    | C21B | C20B | C24B | Fe1B | 58.9(2)    |
| C21A | C20A | Fe1A | C22A | -37.7(2)   | C21B | C20B | Fe1B | C22B | -37.37(19) |
| C21A | C20A | Fe1A | C23A | -81.3(2)   | C21B | C20B | Fe1B | C23B | -81.5(2)   |
| C21A | C20A | Fe1A | C24A | -118.9(3)  | C21B | C20B | Fe1B | C24B | -118.4(3)  |
| C21A | C20A | Fe1A | C25A | 116.6(2)   | C21B | C20B | Fe1B | C25B | 113.5(2)   |
| C21A | C20A | Fe1A | C26A | 75.6(2)    | C21B | C20B | Fe1B | C26B | 72.7(2)    |
| C21A | C20A | Fe1A | C27A | 45.0(5)    | C21B | C20B | Fe1B | C27B | 41.9(6)    |
| C21A | C20A | Fe1A | C28A | -169.1(3)  | C21B | C20B | Fe1B | C28B | -170.9(3)  |
| C21A | C20A | Fe1A | C29A | 158.99(19) | C21B | C20B | Fe1B | C29B | 156.28(19) |
| C21A | C22A | C23A | C24A | -0.3(4)    | C21B | C22B | C23B | C24B | 0.4(4)     |
| C21A | C22A | C23A | Fe1A | -59.5(2)   | C21B | C22B | C23B | Fe1B | -59.1(2)   |
| C21A | C22A | Fe1A | C20A | 37.21(19)  | C21B | C22B | Fe1B | C20B | 37.4(2)    |
| C21A | C22A | Fe1A | C23A | 118.6(3)   | C21B | C22B | Fe1B | C23B | 118.9(3)   |
| C21A | C22A | Fe1A | C24A | 80.8(2)    | C21B | C22B | Fe1B | C24B | 81.3(2)    |
| C21A | C22A | Fe1A | C25A | -46.8(4)   | C21B | C22B | Fe1B | C25B | -49.1(4)   |
| C21A | C22A | Fe1A | C26A | -81.4(2)   | C21B | C22B | Fe1B | C26B | -83.2(2)   |
| C21A | C22A | Fe1A | C27A | -124.0(2)  | C21B | C22B | Fe1B | C27B | -125.7(2)  |
| C21A | C22A | Fe1A | C28A | -165.4(2)  | C21B | C22B | Fe1B | C28B | -166.0(2)  |
| C21A | C22A | Fe1A | C29A | 160.9(4)   | C21B | C22B | Fe1B | C29B | 163.5(5)   |
| C22A | C21A | Fe1A | C20A | -119.8(3)  | C22B | C21B | Fe1B | C20B | -119.9(3)  |
| C22A | C21A | Fe1A | C23A | -37.9(2)   | C22B | C21B | Fe1B | C23B | -38.1(2)   |
| C22A | C21A | Fe1A | C24A | -82.1(2)   | C22B | C21B | Fe1B | C24B | -81.7(2)   |
| C22A | C21A | Fe1A | C25A | 159.4(2)   | C22B | C21B | Fe1B | C25B | 156.4(2)   |
| C22A | C21A | Fe1A | C26A | 116.8(2)   | C22B | C21B | Fe1B | C26B | 113.8(2)   |
| C22A | C21A | Fe1A | C27A | 75.7(2)    | C22B | C21B | Fe1B | C27B | 73.6(3)    |
| C22A | C21A | Fe1A | C28A | 44.6(5)    | C22B | C21B | Fe1B | C28B | 45.3(6)    |
| C22A | C21A | Fe1A | C29A | -166.7(3)  | C22B | C21B | Fe1B | C29B | -170.8(3)  |
| C22A | C23A | C24A | C20A | 0.2(4)     | C22B | C23B | C24B | C20B | -0.2(4)    |
| C22A | C23A | C24A | Fe1A | -59.0(2)   | C22B | C23B | C24B | Fe1B | -59.4(2)   |
| C22A | C23A | Fe1A | C20A | 82.2(2)    | C22B | C23B | Fe1B | C20B | 81.9(2)    |
| C22A | C23A | Fe1A | C21A | 38.4(2)    | C22B | C23B | Fe1B | C21B | 37.9(2)    |
| C22A | C23A | Fe1A | C24A | 119.4(3)   | C22B | C23B | Fe1B | C24B | 119.0(3)   |
| C22A | C23A | Fe1A | C25A | 159.4(4)   | C22B | C23B | Fe1B | C25B | 157.5(5)   |
| C22A | C23A | Fe1A | C26A | -45.8(4)   | C22B | C23B | Fe1B | C26B | -47.1(4)   |
| C22A | C23A | Fe1A | C27A | -80.9(2)   | C22B | C23B | Fe1B | C27B | -82.4(2)   |
| C22A | C23A | Fe1A | C28A | -123.9(2)  | C22B | C23B | Fe1B | C28B | -125.6(2)  |
| C22A | C23A | Fe1A | C29A | -165.7(2)  | C22B | C23B | Fe1B | C29B | -166.9(2)  |
| C23A | C22A | Fe1A | C20A | -81.4(2)   | C23B | C22B | Fe1B | C20B | -81.5(2)   |
| C23A | C22A | Fe1A | C21A | -118.6(3)  | C23B | C22B | Fe1B | C21B | -118.9(3)  |

|      |      |      |      |             |      |      |      |      |             |
|------|------|------|------|-------------|------|------|------|------|-------------|
| C23A | C22A | Fe1A | C24A | -37.8(2)    | C23B | C22B | Fe1B | C24B | -37.57(19)  |
| C23A | C22A | Fe1A | C25A | -165.4(3)   | C23B | C22B | Fe1B | C25B | -168.0(3)   |
| C23A | C22A | Fe1A | C26A | 160.1(2)    | C23B | C22B | Fe1B | C26B | 158.0(2)    |
| C23A | C22A | Fe1A | C27A | 117.4(2)    | C23B | C22B | Fe1B | C27B | 115.4(2)    |
| C23A | C22A | Fe1A | C28A | 76.0(2)     | C23B | C22B | Fe1B | C28B | 75.1(2)     |
| C23A | C22A | Fe1A | C29A | 42.4(6)     | C23B | C22B | Fe1B | C29B | 44.7(6)     |
| C23A | C24A | Fe1A | C20A | 119.7(3)    | C23B | C24B | Fe1B | C20B | 120.5(3)    |
| C23A | C24A | Fe1A | C21A | 81.8(2)     | C23B | C24B | Fe1B | C21B | 82.2(2)     |
| C23A | C24A | Fe1A | C22A | 37.5(2)     | C23B | C24B | Fe1B | C22B | 38.1(2)     |
| C23A | C24A | Fe1A | C25A | -166.38(19) | C23B | C24B | Fe1B | C25B | -168.5(2)   |
| C23A | C24A | Fe1A | C26A | 160.5(4)    | C23B | C24B | Fe1B | C26B | 156.0(5)    |
| C23A | C24A | Fe1A | C27A | -47.9(4)    | C23B | C24B | Fe1B | C27B | -46.9(4)    |
| C23A | C24A | Fe1A | C28A | -82.3(2)    | C23B | C24B | Fe1B | C28B | -83.3(2)    |
| C23A | C24A | Fe1A | C29A | -124.6(2)   | C23B | C24B | Fe1B | C29B | -126.4(2)   |
| C24A | C20A | C21A | C22A | -0.2(4)     | C24B | C20B | C21B | C22B | 0.3(4)      |
| C24A | C20A | C21A | Fe1A | -59.4(2)    | C24B | C20B | C21B | Fe1B | -59.1(2)    |
| C24A | C20A | Fe1A | C21A | 118.9(3)    | C24B | C20B | Fe1B | C21B | 118.4(3)    |
| C24A | C20A | Fe1A | C22A | 81.2(2)     | C24B | C20B | Fe1B | C22B | 81.0(2)     |
| C24A | C20A | Fe1A | C23A | 37.62(19)   | C24B | C20B | Fe1B | C23B | 36.85(19)   |
| C24A | C20A | Fe1A | C25A | -124.5(2)   | C24B | C20B | Fe1B | C25B | -128.2(2)   |
| C24A | C20A | Fe1A | C26A | -165.52(19) | C24B | C20B | Fe1B | C26B | -168.9(2)   |
| C24A | C20A | Fe1A | C27A | 163.9(4)    | C24B | C20B | Fe1B | C27B | 160.3(5)    |
| C24A | C20A | Fe1A | C28A | -50.3(4)    | C24B | C20B | Fe1B | C28B | -52.6(4)    |
| C24A | C20A | Fe1A | C29A | -82.1(2)    | C24B | C20B | Fe1B | C29B | -85.3(2)    |
| C24A | C23A | Fe1A | C20A | -37.25(18)  | C24B | C23B | Fe1B | C20B | -37.13(19)  |
| C24A | C23A | Fe1A | C21A | -81.0(2)    | C24B | C23B | Fe1B | C21B | -81.1(2)    |
| C24A | C23A | Fe1A | C22A | -119.4(3)   | C24B | C23B | Fe1B | C22B | -119.0(3)   |
| C24A | C23A | Fe1A | C25A | 40.0(5)     | C24B | C23B | Fe1B | C25B | 38.5(6)     |
| C24A | C23A | Fe1A | C26A | -165.2(3)   | C24B | C23B | Fe1B | C26B | -166.1(3)   |
| C24A | C23A | Fe1A | C27A | 159.69(19)  | C24B | C23B | Fe1B | C27B | 158.6(2)    |
| C24A | C23A | Fe1A | C28A | 116.7(2)    | C24B | C23B | Fe1B | C28B | 115.4(2)    |
| C24A | C23A | Fe1A | C29A | 74.9(2)     | C24B | C23B | Fe1B | C29B | 74.0(2)     |
| C25A | C26A | C27A | C28A | -0.6(4)     | C25B | C26B | C27B | C28B | -0.8(4)     |
| C25A | C26A | C27A | Fe1A | 59.0(2)     | C25B | C26B | C27B | Fe1B | 58.8(2)     |
| C25A | C26A | Fe1A | C20A | 74.4(2)     | C25B | C26B | Fe1B | C20B | 73.0(2)     |
| C25A | C26A | Fe1A | C21A | 115.7(2)    | C25B | C26B | Fe1B | C21B | 113.7(2)    |
| C25A | C26A | Fe1A | C22A | 158.6(2)    | C25B | C26B | Fe1B | C22B | 156.4(2)    |
| C25A | C26A | Fe1A | C23A | -168.7(3)   | C25B | C26B | Fe1B | C23B | -170.6(3)   |
| C25A | C26A | Fe1A | C24A | 43.5(5)     | C25B | C26B | Fe1B | C24B | 45.0(6)     |
| C25A | C26A | Fe1A | C27A | -119.5(3)   | C25B | C26B | Fe1B | C27B | -119.9(3)   |
| C25A | C26A | Fe1A | C28A | -81.6(2)    | C25B | C26B | Fe1B | C28B | -82.0(2)    |
| C25A | C26A | Fe1A | C29A | -37.9(2)    | C25B | C26B | Fe1B | C29B | -38.2(2)    |
| C25A | C29A | Fe1A | C20A | -80.8(2)    | C25B | C29B | Fe1B | C20B | -82.3(2)    |
| C25A | C29A | Fe1A | C21A | -47.6(4)    | C25B | C29B | Fe1B | C21B | -46.7(4)    |
| C25A | C29A | Fe1A | C22A | 162.7(4)    | C25B | C29B | Fe1B | C22B | 157.4(5)    |
| C25A | C29A | Fe1A | C23A | -164.8(2)   | C25B | C29B | Fe1B | C23B | -166.94(19) |
| C25A | C29A | Fe1A | C24A | -123.2(2)   | C25B | C29B | Fe1B | C24B | -125.72(19) |
| C25A | C29A | Fe1A | C26A | 37.7(2)     | C25B | C29B | Fe1B | C26B | 37.99(19)   |

|      |      |      |      |             |      |      |      |      |           |
|------|------|------|------|-------------|------|------|------|------|-----------|
| C25A | C29A | Fe1A | C27A | 81.5(2)     | C25B | C29B | Fe1B | C27B | 81.7(2)   |
| C25A | C29A | Fe1A | C28A | 118.9(3)    | C25B | C29B | Fe1B | C28B | 119.1(3)  |
| C26A | C25A | C29A | C28A | 0.4(4)      | C26B | C25B | C29B | C28B | -0.5(4)   |
| C26A | C25A | C29A | Fe1A | -59.4(2)    | C26B | C25B | C29B | Fe1B | -60.0(2)  |
| C26A | C25A | Fe1A | C20A | -124.1(2)   | C26B | C25B | Fe1B | C20B | -126.0(2) |
| C26A | C25A | Fe1A | C21A | -82.0(2)    | C26B | C25B | Fe1B | C21B | -83.2(2)  |
| C26A | C25A | Fe1A | C22A | -48.5(4)    | C26B | C25B | Fe1B | C22B | -49.2(4)  |
| C26A | C25A | Fe1A | C23A | 164.5(4)    | C26B | C25B | Fe1B | C23B | 163.2(5)  |
| C26A | C25A | Fe1A | C24A | -164.71(19) | C26B | C25B | Fe1B | C24B | -166.2(2) |
| C26A | C25A | Fe1A | C27A | 37.5(2)     | C26B | C25B | Fe1B | C27B | 37.2(2)   |
| C26A | C25A | Fe1A | C28A | 81.4(2)     | C26B | C25B | Fe1B | C28B | 81.0(2)   |
| C26A | C25A | Fe1A | C29A | 119.2(3)    | C26B | C25B | Fe1B | C29B | 118.7(3)  |
| C26A | C27A | C28A | C29A | 0.9(4)      | C26B | C27B | C28B | C29B | 0.5(4)    |
| C26A | C27A | C28A | Fe1A | 59.6(2)     | C26B | C27B | C28B | Fe1B | 59.3(3)   |
| C26A | C27A | Fe1A | C20A | 40.1(5)     | C26B | C27B | Fe1B | C20B | 39.6(6)   |
| C26A | C27A | Fe1A | C21A | 74.4(2)     | C26B | C27B | Fe1B | C21B | 72.3(3)   |
| C26A | C27A | Fe1A | C22A | 116.4(2)    | C26B | C27B | Fe1B | C22B | 113.3(2)  |
| C26A | C27A | Fe1A | C23A | 158.7(2)    | C26B | C27B | Fe1B | C23B | 156.3(2)  |
| C26A | C27A | Fe1A | C24A | -166.7(3)   | C26B | C27B | Fe1B | C24B | -170.8(3) |
| C26A | C27A | Fe1A | C25A | -37.6(2)    | C26B | C27B | Fe1B | C25B | -37.5(2)  |
| C26A | C27A | Fe1A | C28A | -119.0(3)   | C26B | C27B | Fe1B | C28B | -119.0(3) |
| C26A | C27A | Fe1A | C29A | -81.7(2)    | C26B | C27B | Fe1B | C29B | -81.7(2)  |
| C27A | C26A | Fe1A | C20A | -166.02(19) | C27B | C26B | Fe1B | C20B | -167.1(2) |
| C27A | C26A | Fe1A | C21A | -124.7(2)   | C27B | C26B | Fe1B | C21B | -126.4(2) |
| C27A | C26A | Fe1A | C22A | -81.8(2)    | C27B | C26B | Fe1B | C22B | -83.8(2)  |
| C27A | C26A | Fe1A | C23A | -49.1(4)    | C27B | C26B | Fe1B | C23B | -50.8(4)  |
| C27A | C26A | Fe1A | C24A | 163.0(4)    | C27B | C26B | Fe1B | C24B | 164.9(5)  |
| C27A | C26A | Fe1A | C25A | 119.5(3)    | C27B | C26B | Fe1B | C25B | 119.9(3)  |
| C27A | C26A | Fe1A | C28A | 37.9(2)     | C27B | C26B | Fe1B | C28B | 37.8(2)   |
| C27A | C26A | Fe1A | C29A | 81.7(2)     | C27B | C26B | Fe1B | C29B | 81.6(2)   |
| C27A | C28A | C29A | C25A | -0.8(4)     | C27B | C28B | C29B | C25B | 0.0(4)    |
| C27A | C28A | C29A | Fe1A | 58.9(2)     | C27B | C28B | C29B | Fe1B | 58.8(3)   |
| C27A | C28A | Fe1A | C20A | -164.6(3)   | C27B | C28B | Fe1B | C20B | -166.4(3) |
| C27A | C28A | Fe1A | C21A | 40.3(5)     | C27B | C28B | Fe1B | C21B | 36.0(6)   |
| C27A | C28A | Fe1A | C22A | 74.9(2)     | C27B | C28B | Fe1B | C22B | 71.7(3)   |
| C27A | C28A | Fe1A | C23A | 116.6(2)    | C27B | C28B | Fe1B | C23B | 113.8(2)  |
| C27A | C28A | Fe1A | C24A | 159.7(2)    | C27B | C28B | Fe1B | C24B | 156.6(2)  |
| C27A | C28A | Fe1A | C25A | -81.8(2)    | C27B | C28B | Fe1B | C25B | -81.7(2)  |
| C27A | C28A | Fe1A | C26A | -37.8(2)    | C27B | C28B | Fe1B | C26B | -37.7(2)  |
| C27A | C28A | Fe1A | C29A | -119.8(3)   | C27B | C28B | Fe1B | C29B | -119.8(3) |
| C28A | C27A | Fe1A | C20A | 159.0(4)    | C28B | C27B | Fe1B | C20B | 158.6(4)  |
| C28A | C27A | Fe1A | C21A | -166.6(2)   | C28B | C27B | Fe1B | C21B | -168.7(2) |
| C28A | C27A | Fe1A | C22A | -124.6(2)   | C28B | C27B | Fe1B | C22B | -127.7(2) |
| C28A | C27A | Fe1A | C23A | -82.3(2)    | C28B | C27B | Fe1B | C23B | -84.7(2)  |
| C28A | C27A | Fe1A | C24A | -47.7(4)    | C28B | C27B | Fe1B | C24B | -51.8(4)  |
| C28A | C27A | Fe1A | C25A | 81.4(2)     | C28B | C27B | Fe1B | C25B | 81.6(2)   |
| C28A | C27A | Fe1A | C26A | 119.0(3)    | C28B | C27B | Fe1B | C26B | 119.0(3)  |
| C28A | C27A | Fe1A | C29A | 37.3(2)     | C28B | C27B | Fe1B | C29B | 37.3(2)   |



|      |      |      |      |            |      |      |      |      |             |
|------|------|------|------|------------|------|------|------|------|-------------|
| C28A | C29A | Fe1A | C20A | 160.25(19) | C28B | C29B | Fe1B | C20B | 158.65(18)  |
| C28A | C29A | Fe1A | C21A | -166.5(3)  | C28B | C29B | Fe1B | C21B | -165.8(3)   |
| C28A | C29A | Fe1A | C22A | 43.8(5)    | C28B | C29B | Fe1B | C22B | 38.4(6)     |
| C28A | C29A | Fe1A | C23A | 76.3(2)    | C28B | C29B | Fe1B | C23B | 74.0(2)     |
| C28A | C29A | Fe1A | C24A | 117.8(2)   | C28B | C29B | Fe1B | C24B | 115.22(19)  |
| C28A | C29A | Fe1A | C25A | -118.9(3)  | C28B | C29B | Fe1B | C25B | -119.1(3)   |
| C28A | C29A | Fe1A | C26A | -81.2(2)   | C28B | C29B | Fe1B | C26B | -81.1(2)    |
| C28A | C29A | Fe1A | C27A | -37.41(19) | C28B | C29B | Fe1B | C27B | -37.40(19)  |
| C29A | C25A | C26A | C27A | 0.2(4)     | C29B | C25B | C26B | C27B | 0.8(4)      |
| C29A | C25A | C26A | Fe1A | 59.2(2)    | C29B | C25B | C26B | Fe1B | 60.1(2)     |
| C29A | C25A | Fe1A | C20A | 116.7(2)   | C29B | C25B | Fe1B | C20B | 115.3(2)    |
| C29A | C25A | Fe1A | C21A | 158.8(2)   | C29B | C25B | Fe1B | C21B | 158.09(19)  |
| C29A | C25A | Fe1A | C22A | -167.7(3)  | C29B | C25B | Fe1B | C22B | -167.9(3)   |
| C29A | C25A | Fe1A | C23A | 45.3(5)    | C29B | C25B | Fe1B | C23B | 44.6(6)     |
| C29A | C25A | Fe1A | C24A | 76.1(2)    | C29B | C25B | Fe1B | C24B | 75.1(2)     |
| C29A | C25A | Fe1A | C26A | -119.2(3)  | C29B | C25B | Fe1B | C26B | -118.7(3)   |
| C29A | C25A | Fe1A | C27A | -81.7(2)   | C29B | C25B | Fe1B | C27B | -81.5(2)    |
| C29A | C25A | Fe1A | C28A | -37.8(2)   | C29B | C25B | Fe1B | C28B | -37.65(19)  |
| C29A | C28A | Fe1A | C20A | -44.7(4)   | C29B | C28B | Fe1B | C20B | -46.6(4)    |
| C29A | C28A | Fe1A | C21A | 160.1(4)   | C29B | C28B | Fe1B | C21B | 155.8(5)    |
| C29A | C28A | Fe1A | C22A | -165.2(2)  | C29B | C28B | Fe1B | C22B | -168.53(19) |
| C29A | C28A | Fe1A | C23A | -123.6(2)  | C29B | C28B | Fe1B | C23B | -126.46(19) |
| C29A | C28A | Fe1A | C24A | -80.4(2)   | C29B | C28B | Fe1B | C24B | -83.6(2)    |
| C29A | C28A | Fe1A | C25A | 38.05(19)  | C29B | C28B | Fe1B | C25B | 38.05(19)   |
| C29A | C28A | Fe1A | C26A | 82.0(2)    | C29B | C28B | Fe1B | C26B | 82.1(2)     |
| C29A | C28A | Fe1A | C27A | 119.8(3)   | C29B | C28B | Fe1B | C27B | 119.8(3)    |
| Fe1A | C20A | C21A | C22A | 59.1(2)    | Fe1B | C20B | C21B | C22B | 59.4(3)     |
| Fe1A | C20A | C24A | C23A | -59.0(2)   | Fe1B | C20B | C24B | C23B | -58.9(2)    |
| Fe1A | C21A | C22A | C23A | 60.0(2)    | Fe1B | C21B | C22B | C23B | 59.2(2)     |
| Fe1A | C22A | C23A | C24A | 59.2(2)    | Fe1B | C22B | C23B | C24B | 59.5(2)     |
| Fe1A | C23A | C24A | C20A | 59.2(2)    | Fe1B | C23B | C24B | C20B | 59.1(2)     |
| Fe1A | C25A | C26A | C27A | -59.0(2)   | Fe1B | C25B | C26B | C27B | -59.3(3)    |
| Fe1A | C25A | C29A | C28A | 59.8(2)    | Fe1B | C25B | C29B | C28B | 59.4(2)     |
| Fe1A | C26A | C27A | C28A | -59.6(2)   | Fe1B | C26B | C27B | C28B | -59.6(3)    |
| Fe1A | C27A | C28A | C29A | -58.8(2)   | Fe1B | C27B | C28B | C29B | -58.9(2)    |
| Fe1A | C28A | C29A | C25A | -59.6(2)   | Fe1B | C28B | C29B | C25B | -58.8(2)    |
| N1A  | C4A  | C5A  | C6A  | -0.9(5)    | N1B  | C4B  | C5B  | C6B  | -0.3(5)     |
| N1A  | C14A | C15A | C10A | 178.2(3)   | N1B  | C14B | C15B | C10B | 180.0(3)    |
| N1A  | C14A | C15A | N2A  | -0.8(4)    | N1B  | C14B | C15B | N2B  | 0.7(4)      |
| O1A  | C1A  | Re1A | C2A  | 56(20)     | O1B  | C1B  | Re1B | C2B  | 156(3)      |
| O1A  | C1A  | Re1A | C3A  | -30(20)    | O1B  | C1B  | Re1B | C3B  | 70(3)       |
| O1A  | C1A  | Re1A | N1A  | -124(20)   | O1B  | C1B  | Re1B | N1B  | -28(3)      |
| O1A  | C1A  | Re1A | N2A  | -153(19)   | O1B  | C1B  | Re1B | N2B  | -41(4)      |
| O1A  | C1A  | Re1A | O4A  | 153(20)    | O1B  | C1B  | Re1B | O4B  | -108(3)     |
| O2A  | C2A  | Re1A | C1A  | -92(4)     | O2B  | C2B  | Re1B | C1B  | -67(12)     |
| O2A  | C2A  | Re1A | C3A  | -4(4)      | O2B  | C2B  | Re1B | C3B  | 21(12)      |
| O2A  | C2A  | Re1A | N1A  | 89(4)      | O2B  | C2B  | Re1B | N1B  | 158(11)     |
| O2A  | C2A  | Re1A | N2A  | 92(4)      | O2B  | C2B  | Re1B | N2B  | 117(12)     |

|     |      |      |      |          |     |      |      |      |          |
|-----|------|------|------|----------|-----|------|------|------|----------|
| O2A | C2A  | Re1A | O4A  | 171(4)   | O2B | C2B  | Re1B | O4B  | -165(12) |
| O3A | C3A  | Re1A | C1A  | 25(8)    | O3B | C3B  | Re1B | C1B  | 57(5)    |
| O3A | C3A  | Re1A | C2A  | -64(8)   | O3B | C3B  | Re1B | C2B  | -34(5)   |
| O3A | C3A  | Re1A | N1A  | 122(8)   | O3B | C3B  | Re1B | N1B  | 150(5)   |
| O3A | C3A  | Re1A | N2A  | -161(8)  | O3B | C3B  | Re1B | N2B  | -133(5)  |
| O3A | C3A  | Re1A | O4A  | 176(100) | O3B | C3B  | Re1B | O4B  | -142(4)  |
| O4A | C16A | C17A | C18A | -55.6(4) | O4B | C16B | C17B | C18B | -27.8(4) |
| O5A | C16A | C17A | C18A | 123.4(3) | O5B | C16B | C17B | C18B | 152.9(3) |
| O5A | C16A | O4A  | Re1A | -8.3(5)  | O5B | C16B | O4B  | Re1B | -4.4(4)  |
